# Supplementary material
Source: publisher figshare collection journal article supplement (https://tandf.figshare.com/ndownloader/files/21556884)
Supplement: Supplementary file 1 [file 21556884]

**Supplementary Material**

Synthesis of novel pyrimido[1,2-*a*]pyrimidines by Fe3O4@PAP as an efficient and reusable magnetic nanocatalyst

Fatemeh Tajali Rad,a Hassan Kefayati,a,[[1]](#footnote-2) Shahab Shariati a

*a Department of Chemistry, Rasht Branch, Islamic Azad University, Rasht, Iran*

**Ethyl-2-(*p*-tolyl)-4-phenyl-7-(2-hydroxybenzoyl)-4*H*-pyrimido[1,2-*a*]pyrimidine-3-carboxylate (6a):**

Crystal yellow; m.p: 255-257 oC; IR (KBr, cm-1): 3458 (OH), 3055 (CH-Ar), 2975 (CH-Aliphatic), 1683, 1620 (CO); 1H NMR (400 MHz, CDCl3): 0.83 (t, 3H, CH3), 2.37 (s, 3H, CH3), 3.88 (q, 2H, CH2), 5.42 (s, 1H, H-a), 5.91 (s, 1H, H-b), 6.03 (s, 1H, H-c), 7.12 (d, *J* = 8.0 Hz, 2H, H-Ar), 7.22 (d, *J* = 7.6 Hz, 2H, H-Ar), 7.42 (d, *J* = 6.8 Hz, 4H, H-Ar), 7.47 (t, *J* = 7.6 Hz, 2H, H-Ar), 7.52-7.57 (m, 2H, H-Ar), 7.92 (d, *J* = 8 Hz, 1H, H-Ar), 11.95 (s, 1H, OH) ppm; 13C NMR (100.6 Hz, CDCl3): δ = 13.5, 21.3, 57.3, 60.2, 82.9, 103.5, 108.7, 118.1, 122.5, 124.2, 127.4, 127.6, 128.2, 128.6, 129.2, 129.9, 130.2, 135.1, 135.7, 136.5, 139.2, 141.0, 146.5, 149.1, 155.9, 164.8, 179.6 ppm; anal. calcd for C30H25N3O4: C 73.3, H 5.13, N 8.55, O 13.02. Found: C 73.3, H 5.12, N 8.56, O 13.02.


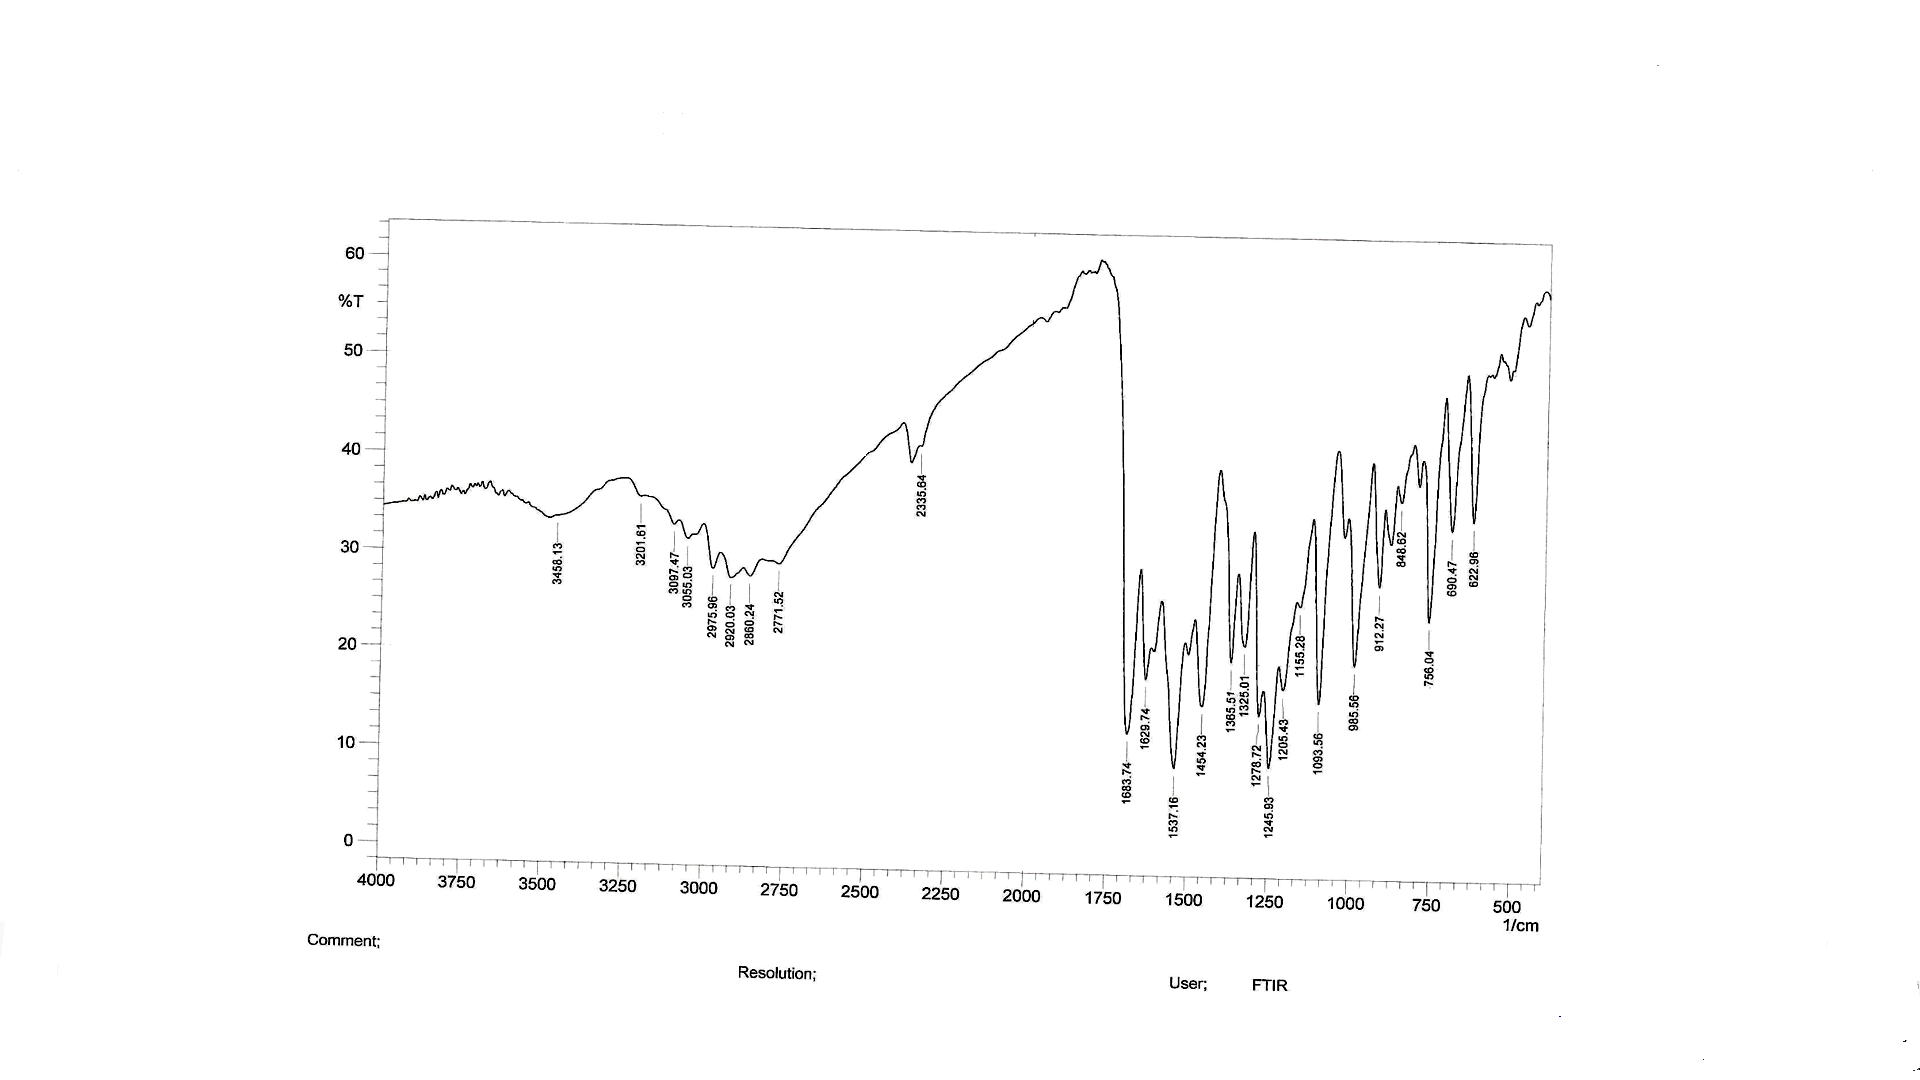


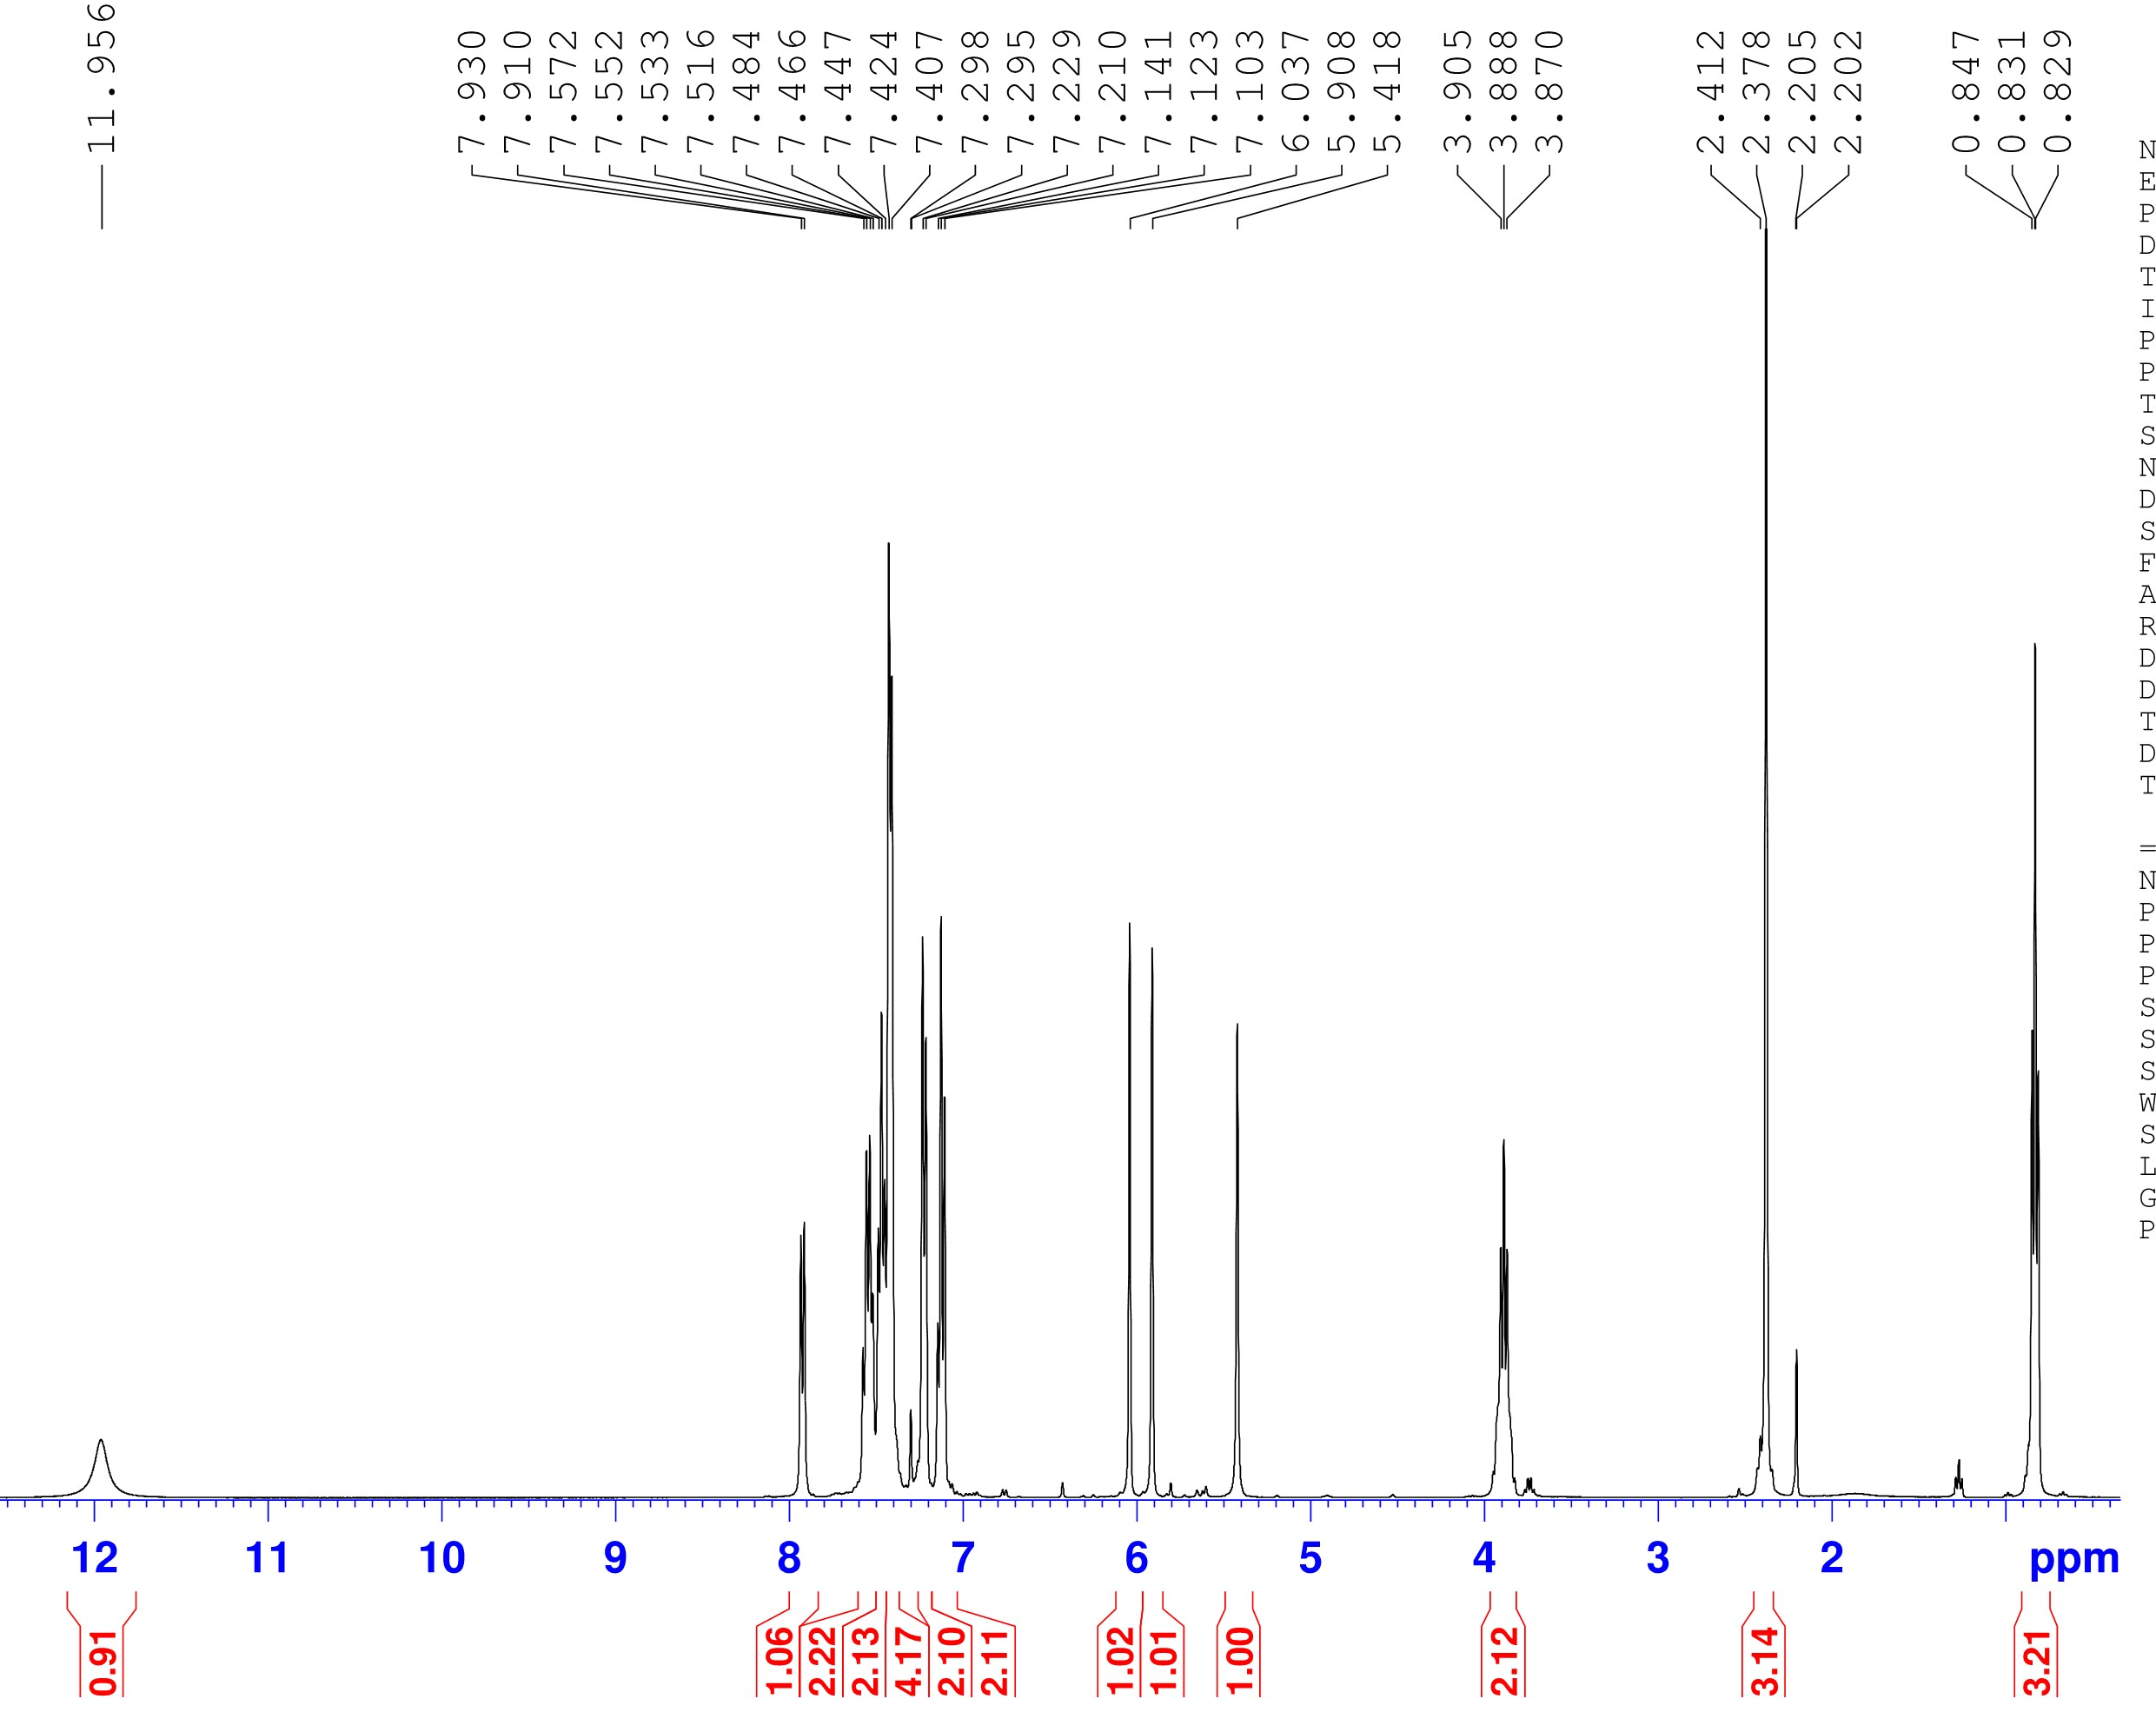


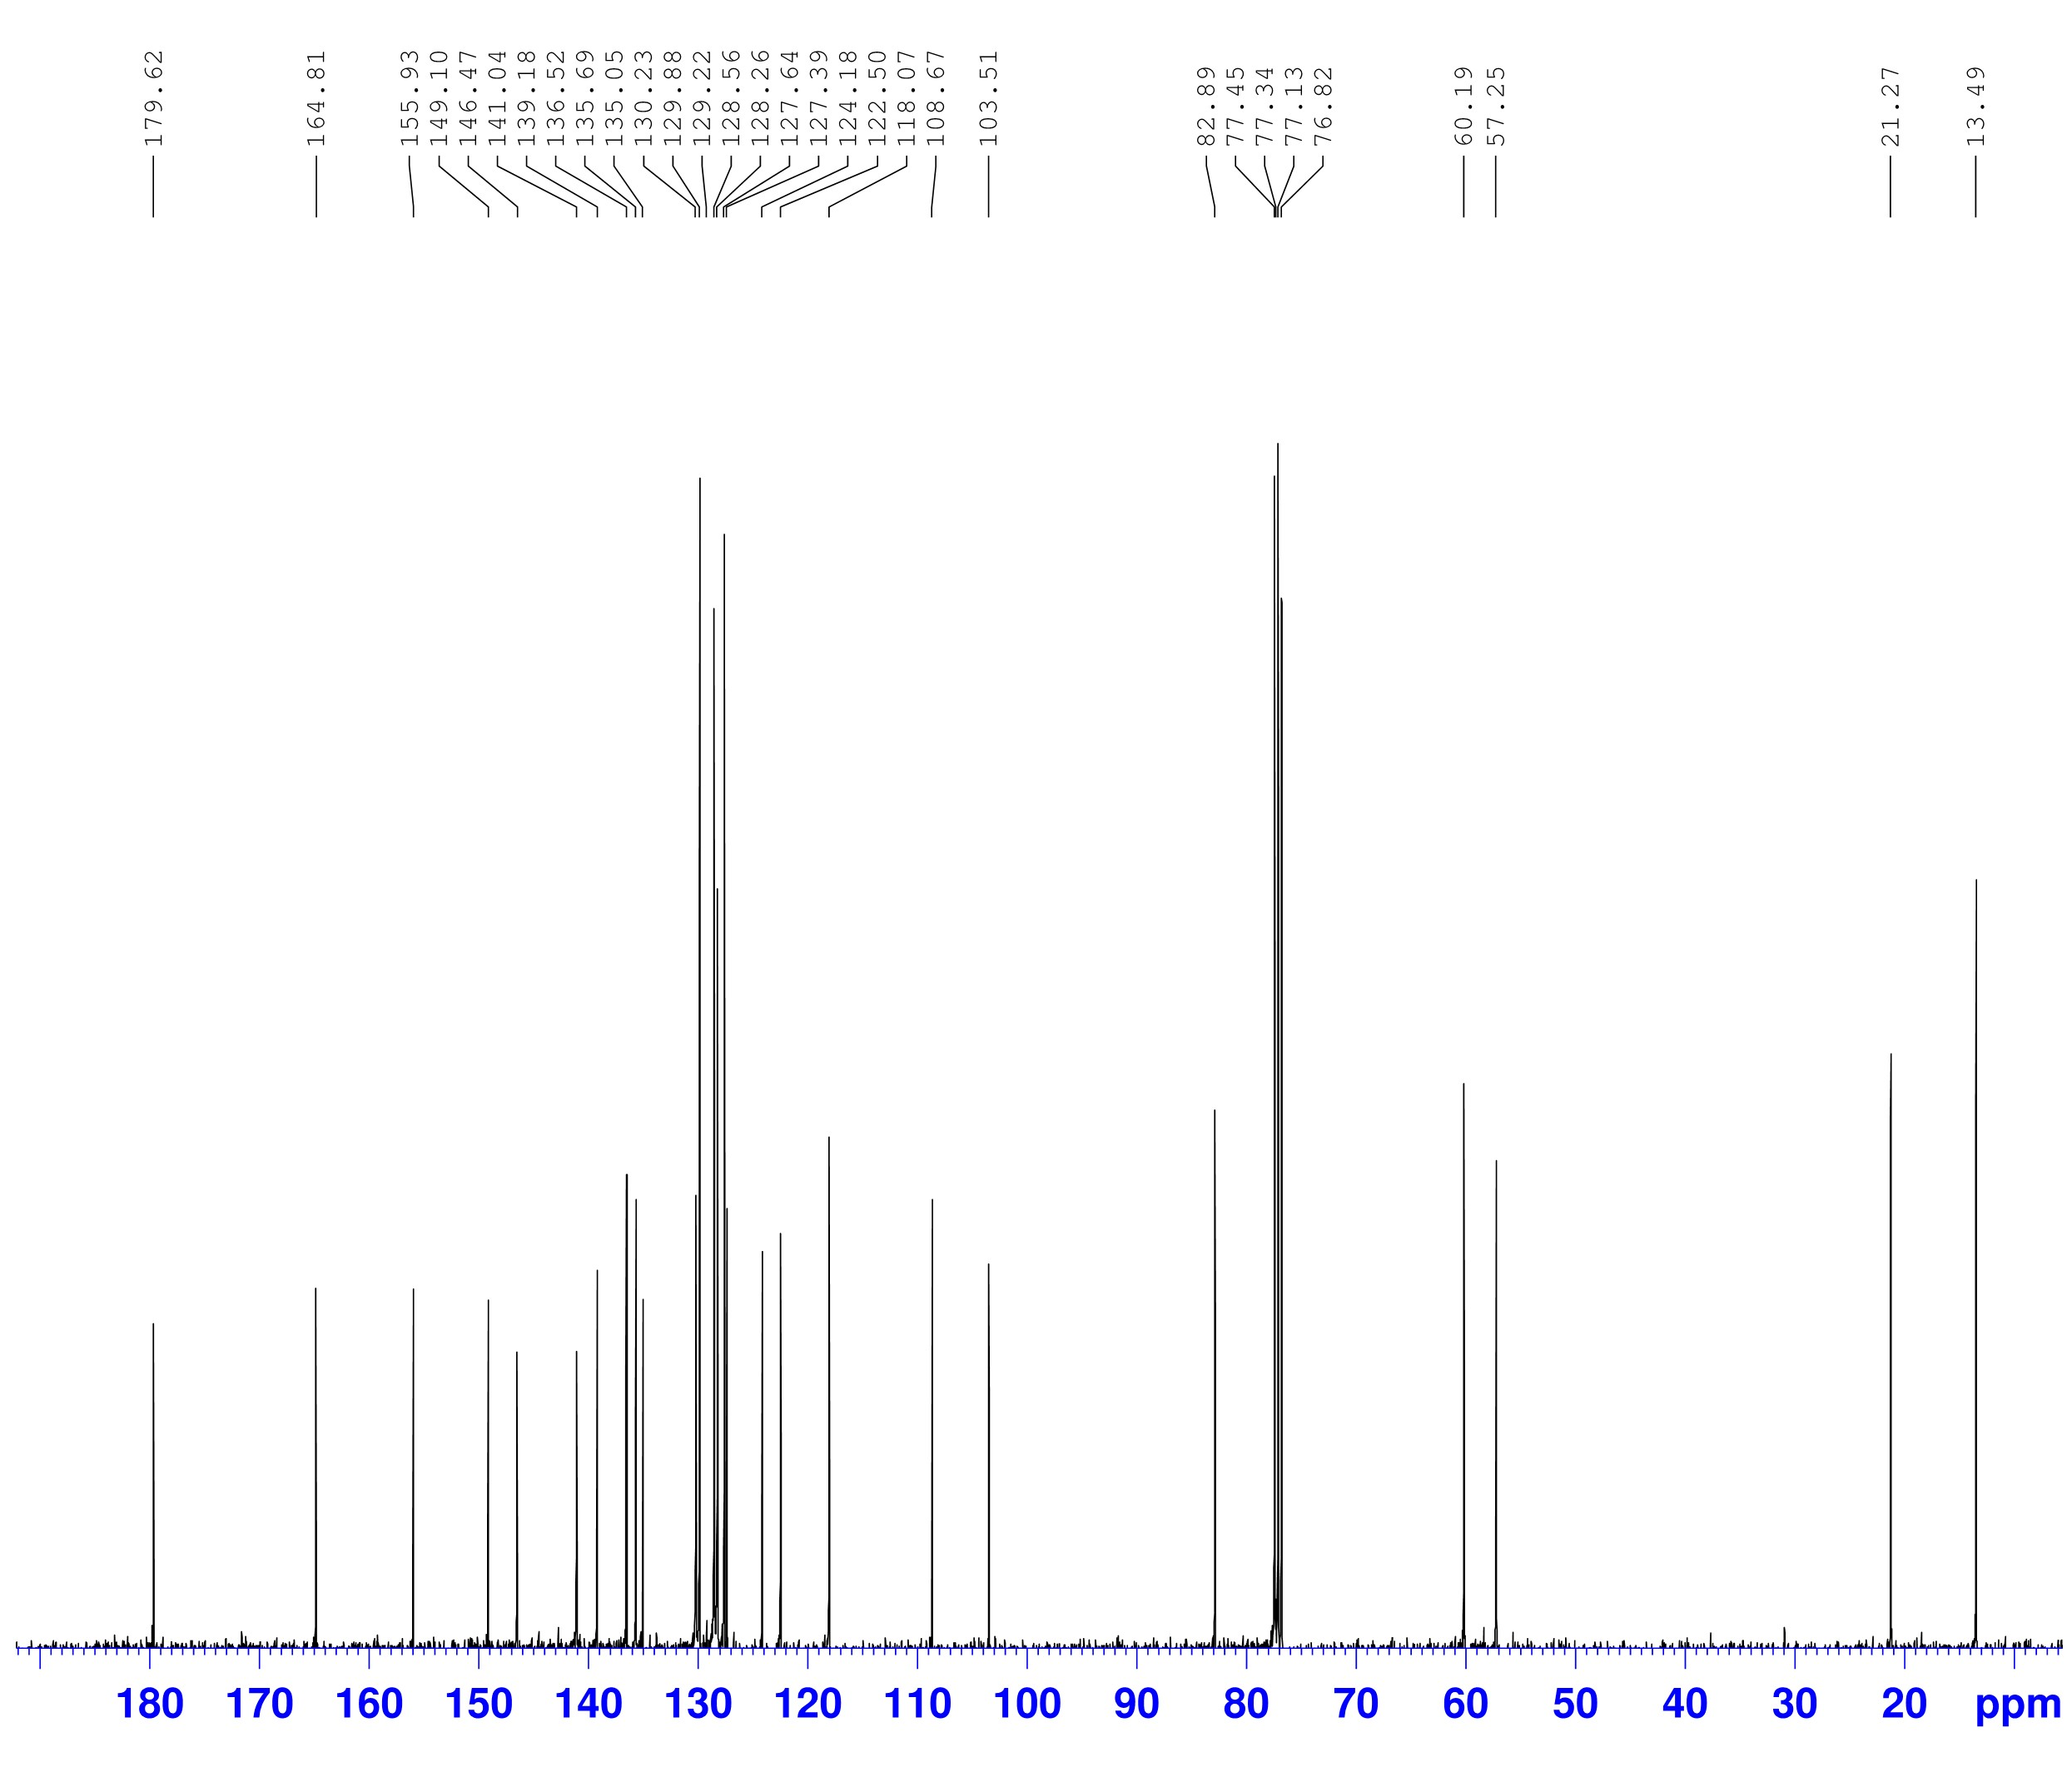


**Ethyl-2-(3-methoxyphenyl)-4-phenyl-7-(2-hydroxybenzoyl)-4*H*-pyrimido[1,2-*a*] pyrimidine-3-carboxylate (6b):**

Crystal yellow; m.p: 254-256 oC; IR (KBr, cm-1): 3452 (OH), 3062 (CH-Ar), 2968 (CH-Aliphatic), 1683 (CO); 1H NMR (500 MHz, CDCl3): δ = 0.80 (t, 3H, CH3), 3.81 (s, 3H, OCH3), 3.88 (q, 2H, CH2), 5.47 (s, 1H, H-a), 5.91 (s, 1H, H-b), 6.03 (s, 1H, H-c), 6.90 (d, *J* = 8.2 Hz, 1H, H-Ar), 7.05 (s, 1H, H-Ar), 7.09 (m, 3H, H-Ar), 7.30 (t, 1H, H-Ar), 7.39 (d, *J* = 7.36 Hz, 2H, H-Ar), 7.45 (t, 2H, H-Ar), 7.54 (m, 2H, H-Ar), 7.90 (dd, *J* = 1.3, 7.75 Hz, 1H, H-Ar), 11.70 (s, 1H, OH); 13C NMR (100.6 Hz, CDCl3): δ = 13.9, 55.7, 57.7, 60.6, 83.3, 103.6, 109.1, 114.2, 114.4, 118.4, 120.1, 122.9, 124.5, 127.8, 128.6, 128.9, 130.6, 130.7, 135.4, 136.1, 141.3, 147.0, 149.4, 156.3, 160.4, 165.1, 180.0 ppm. anal. calcd for C30H25N3O5: C 70.99, H 4.96, N 8.28, O 15.76. Found: C 71.0, H 5.29, N 8.28, O 15.76.


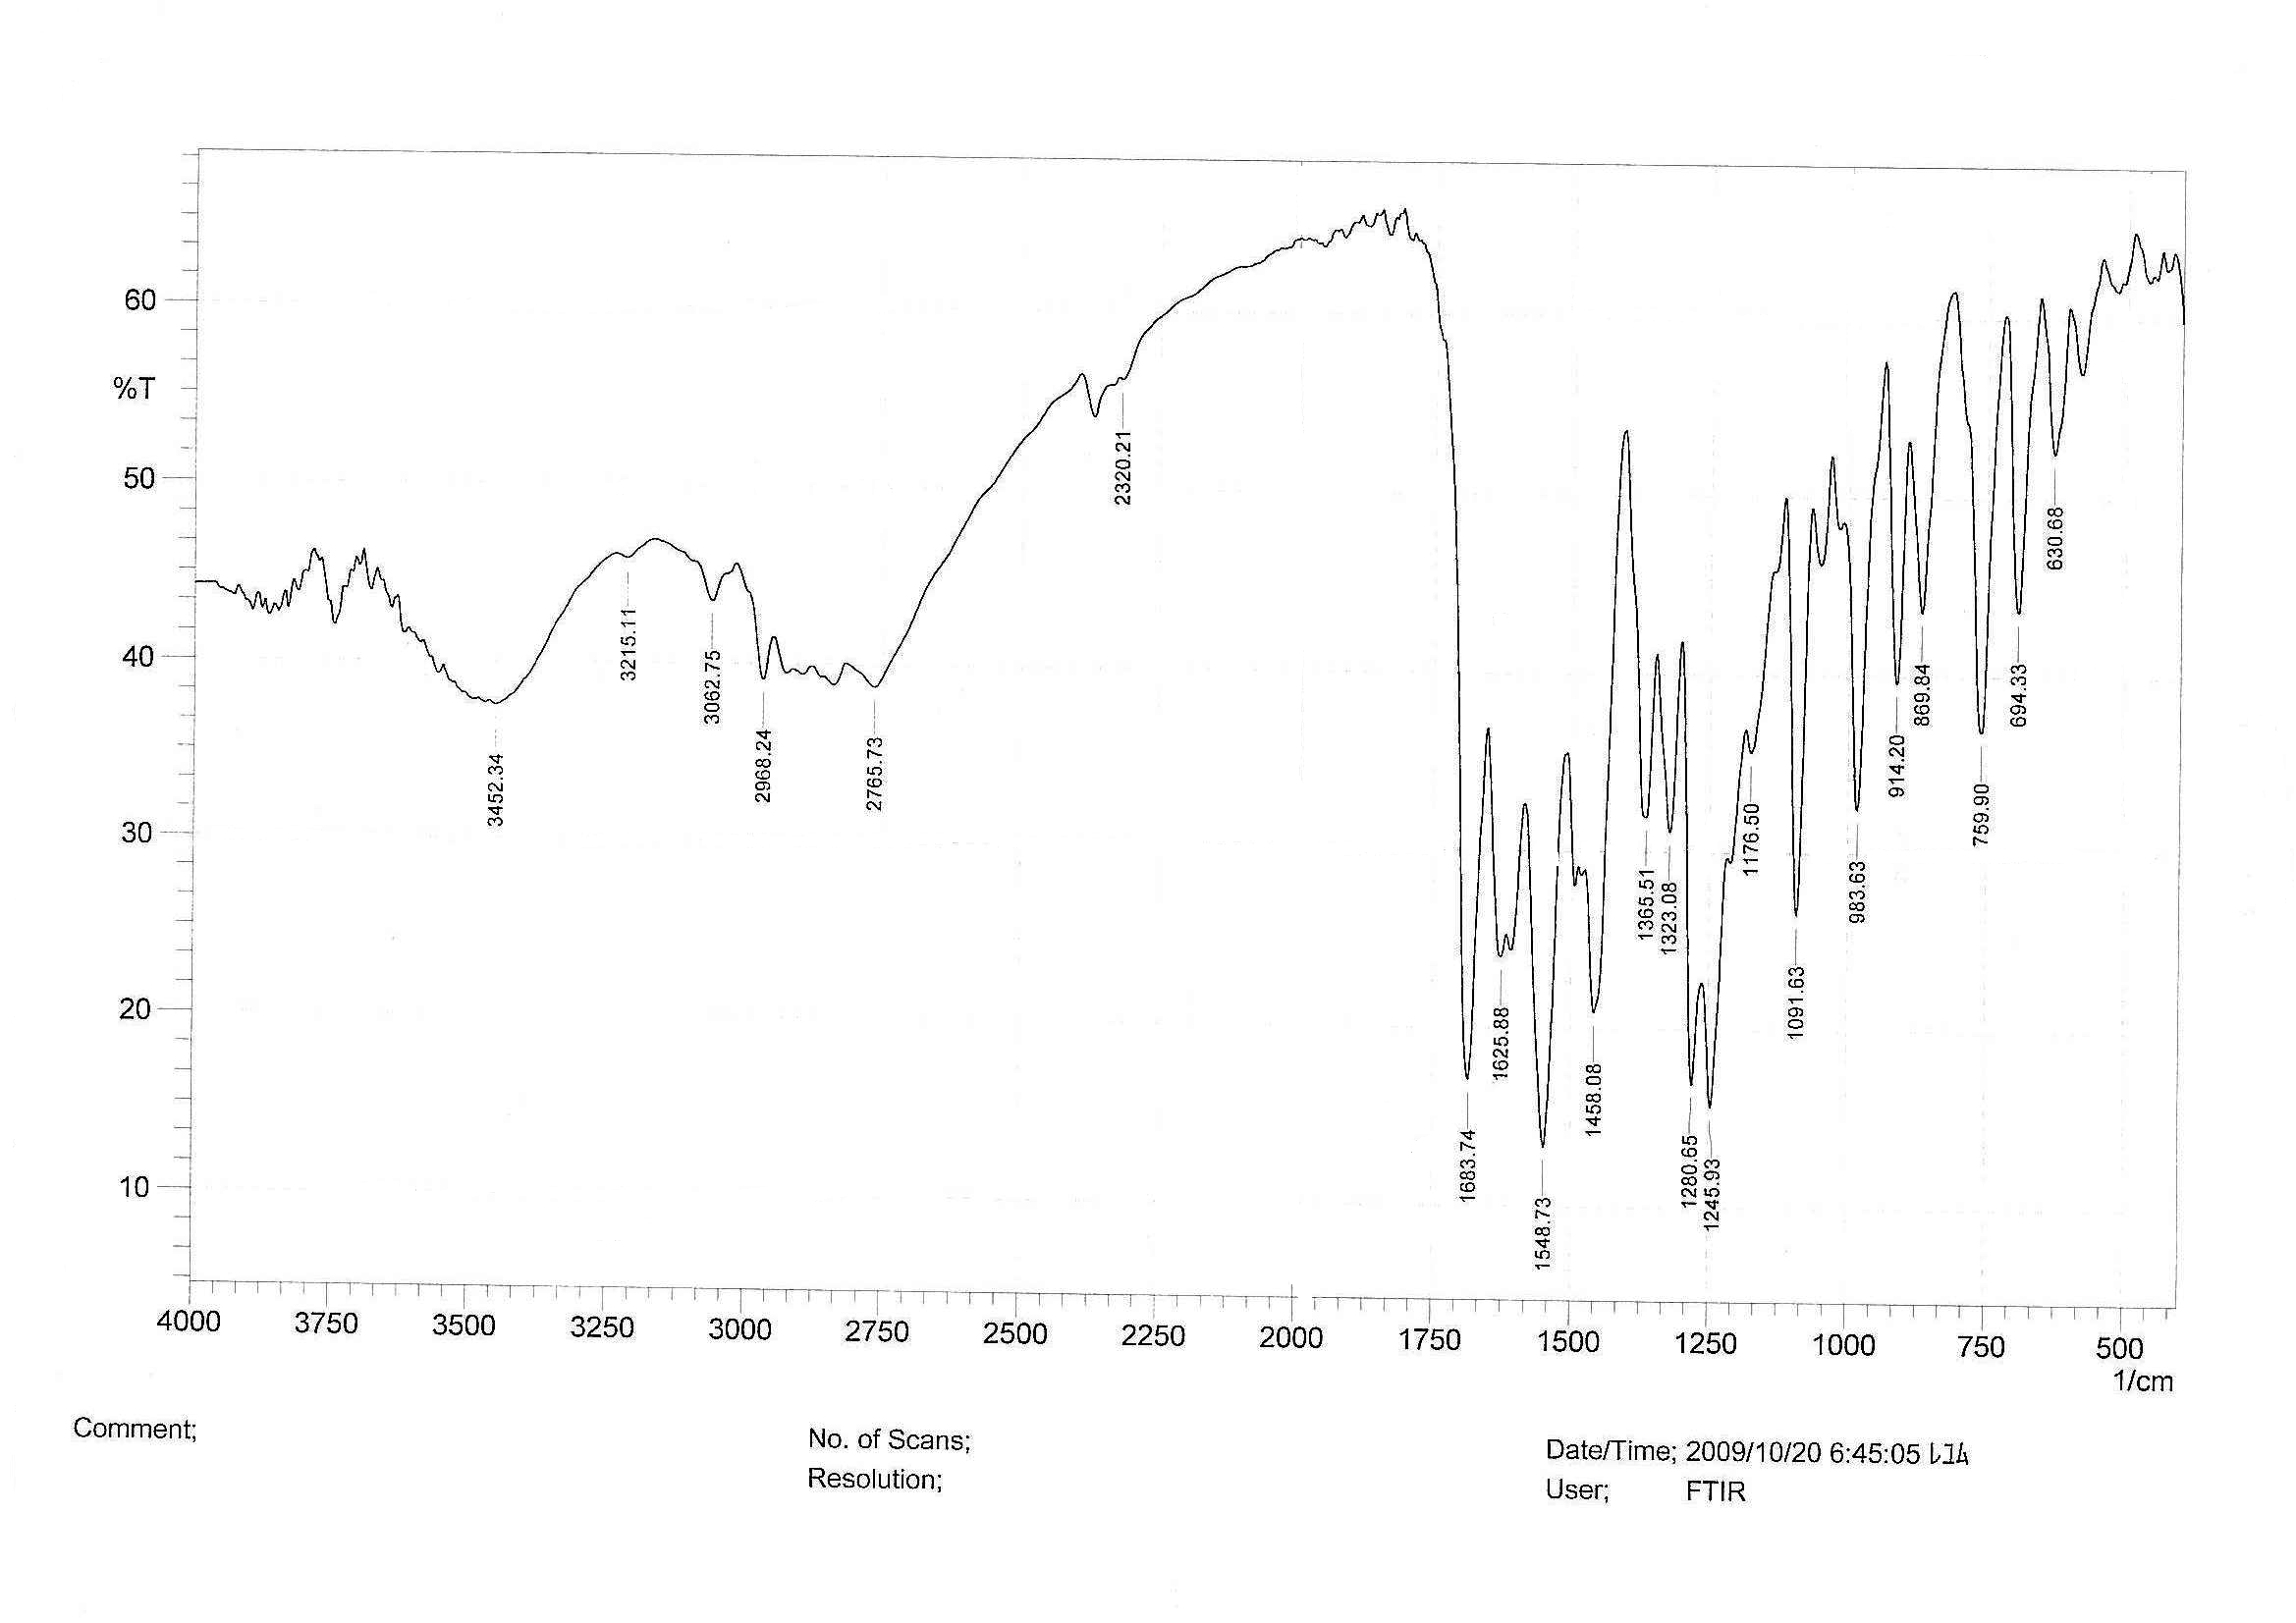

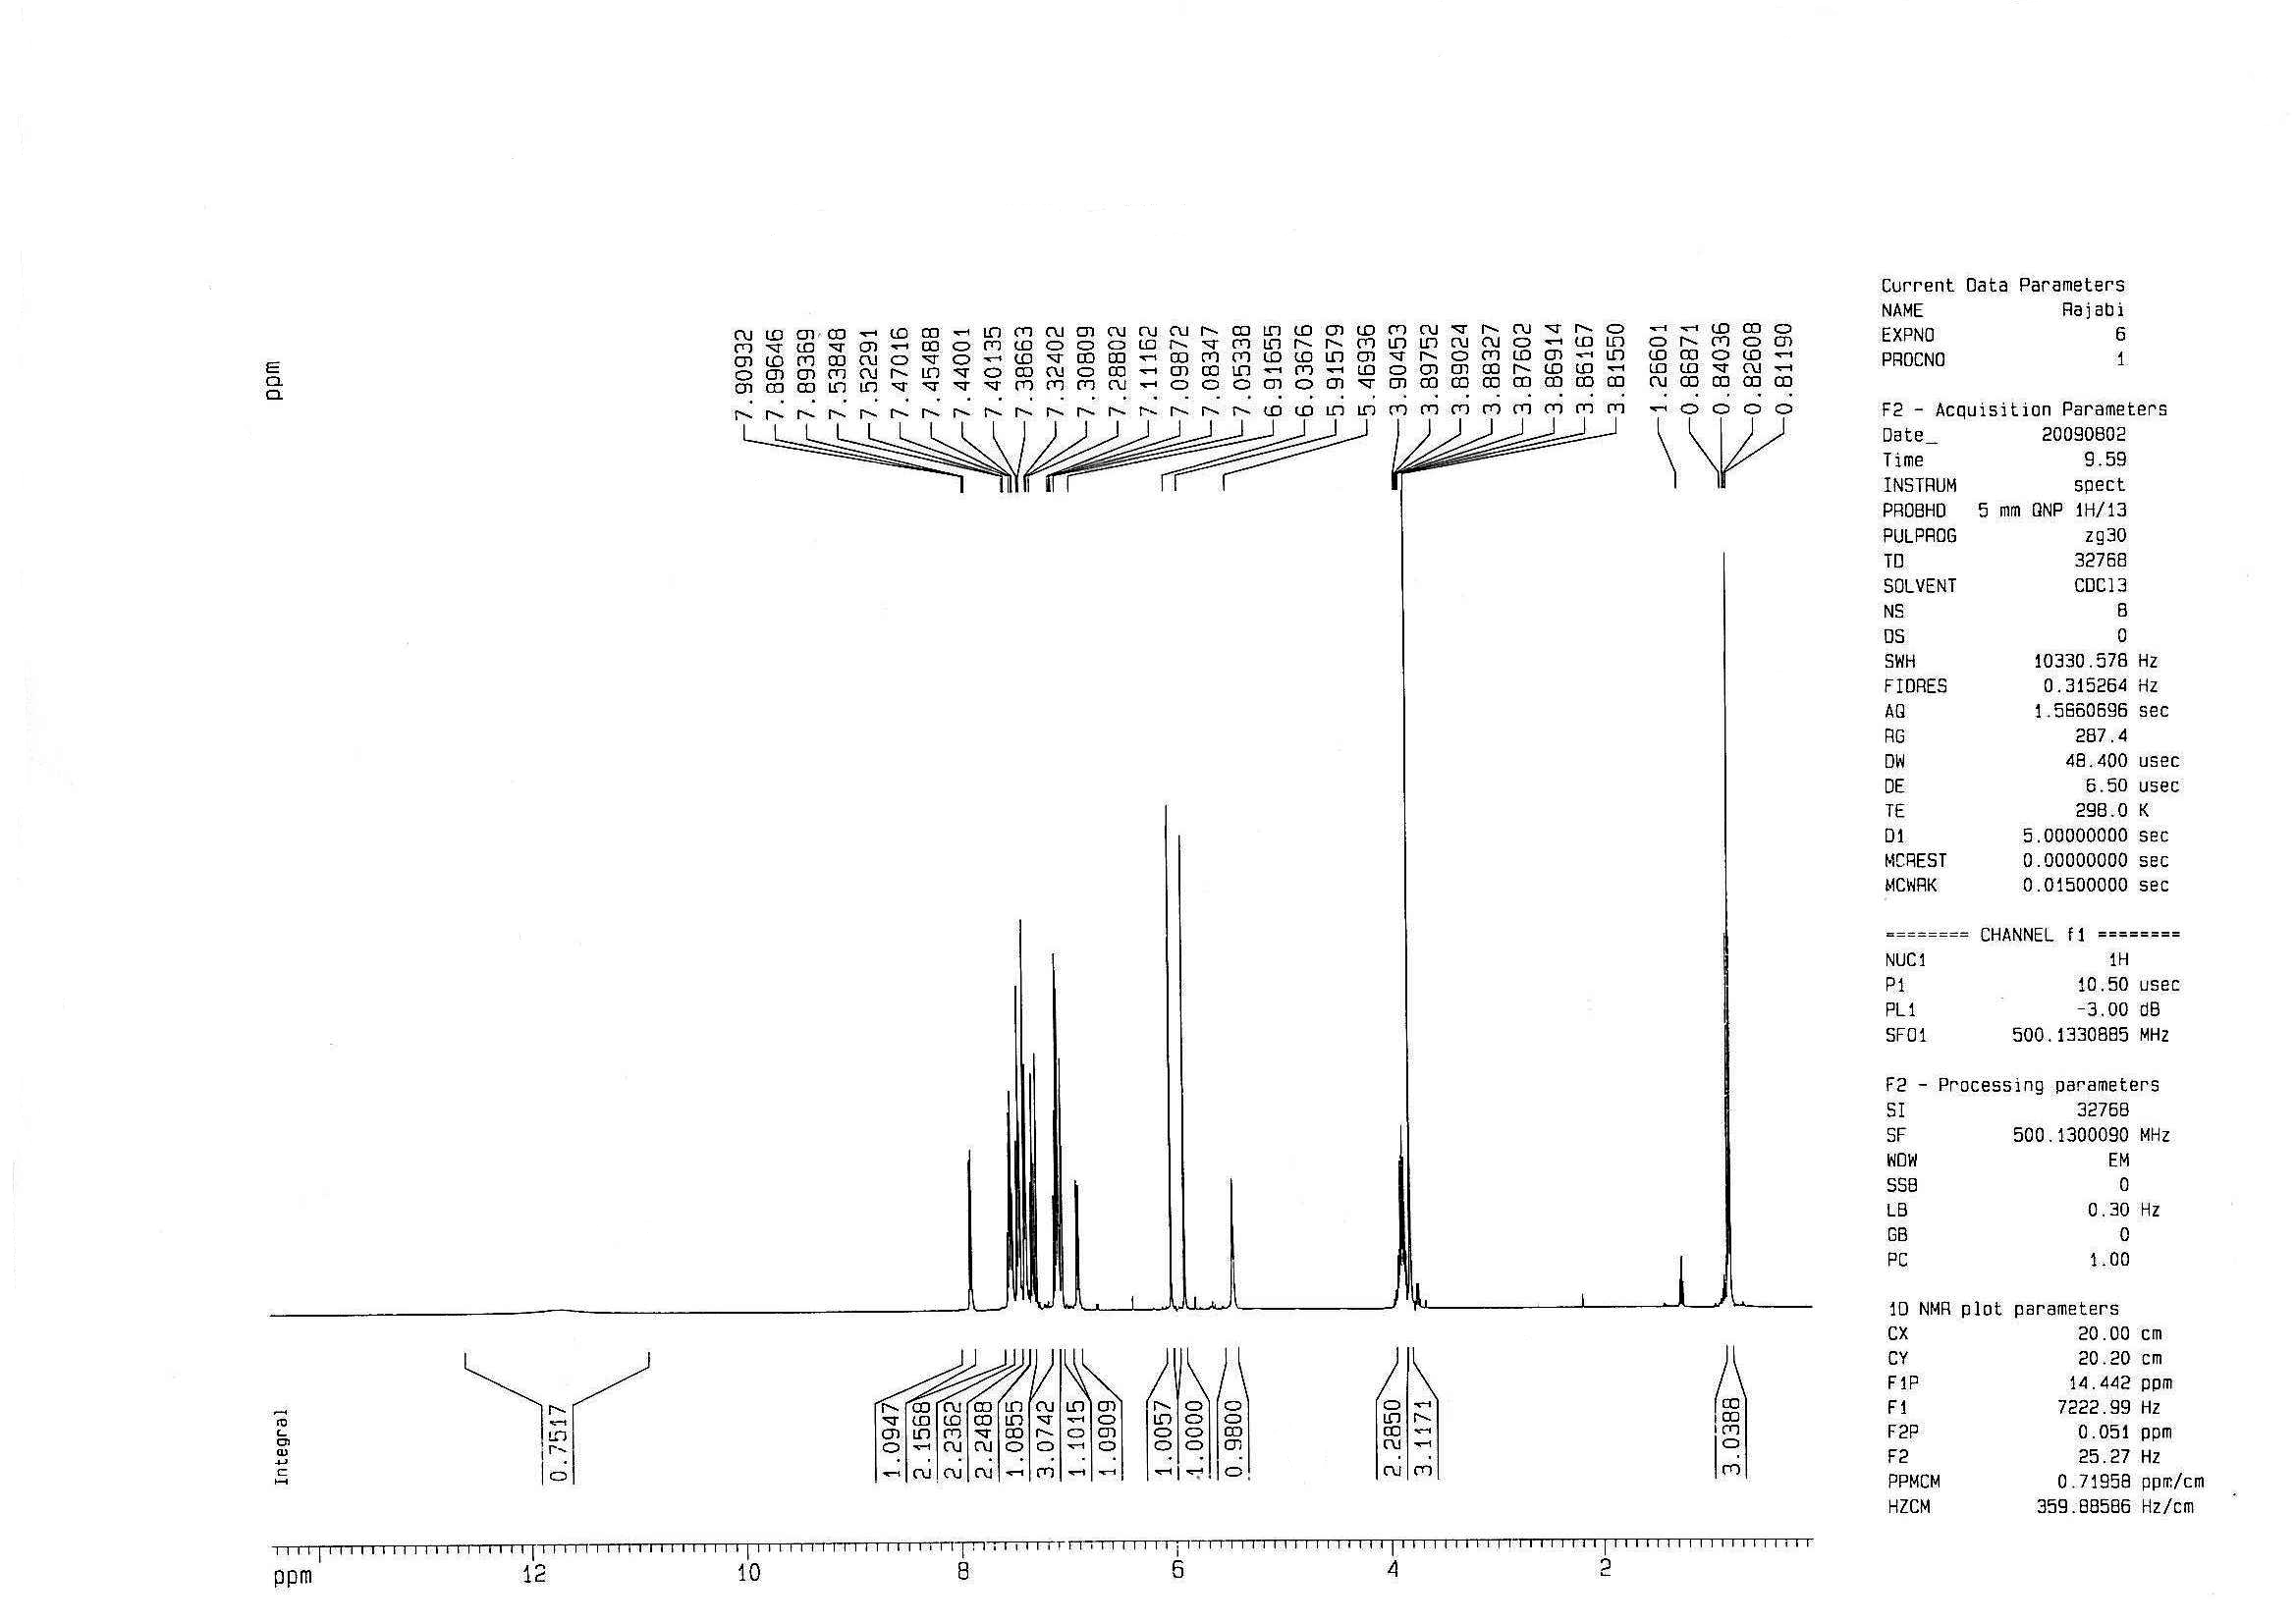


**
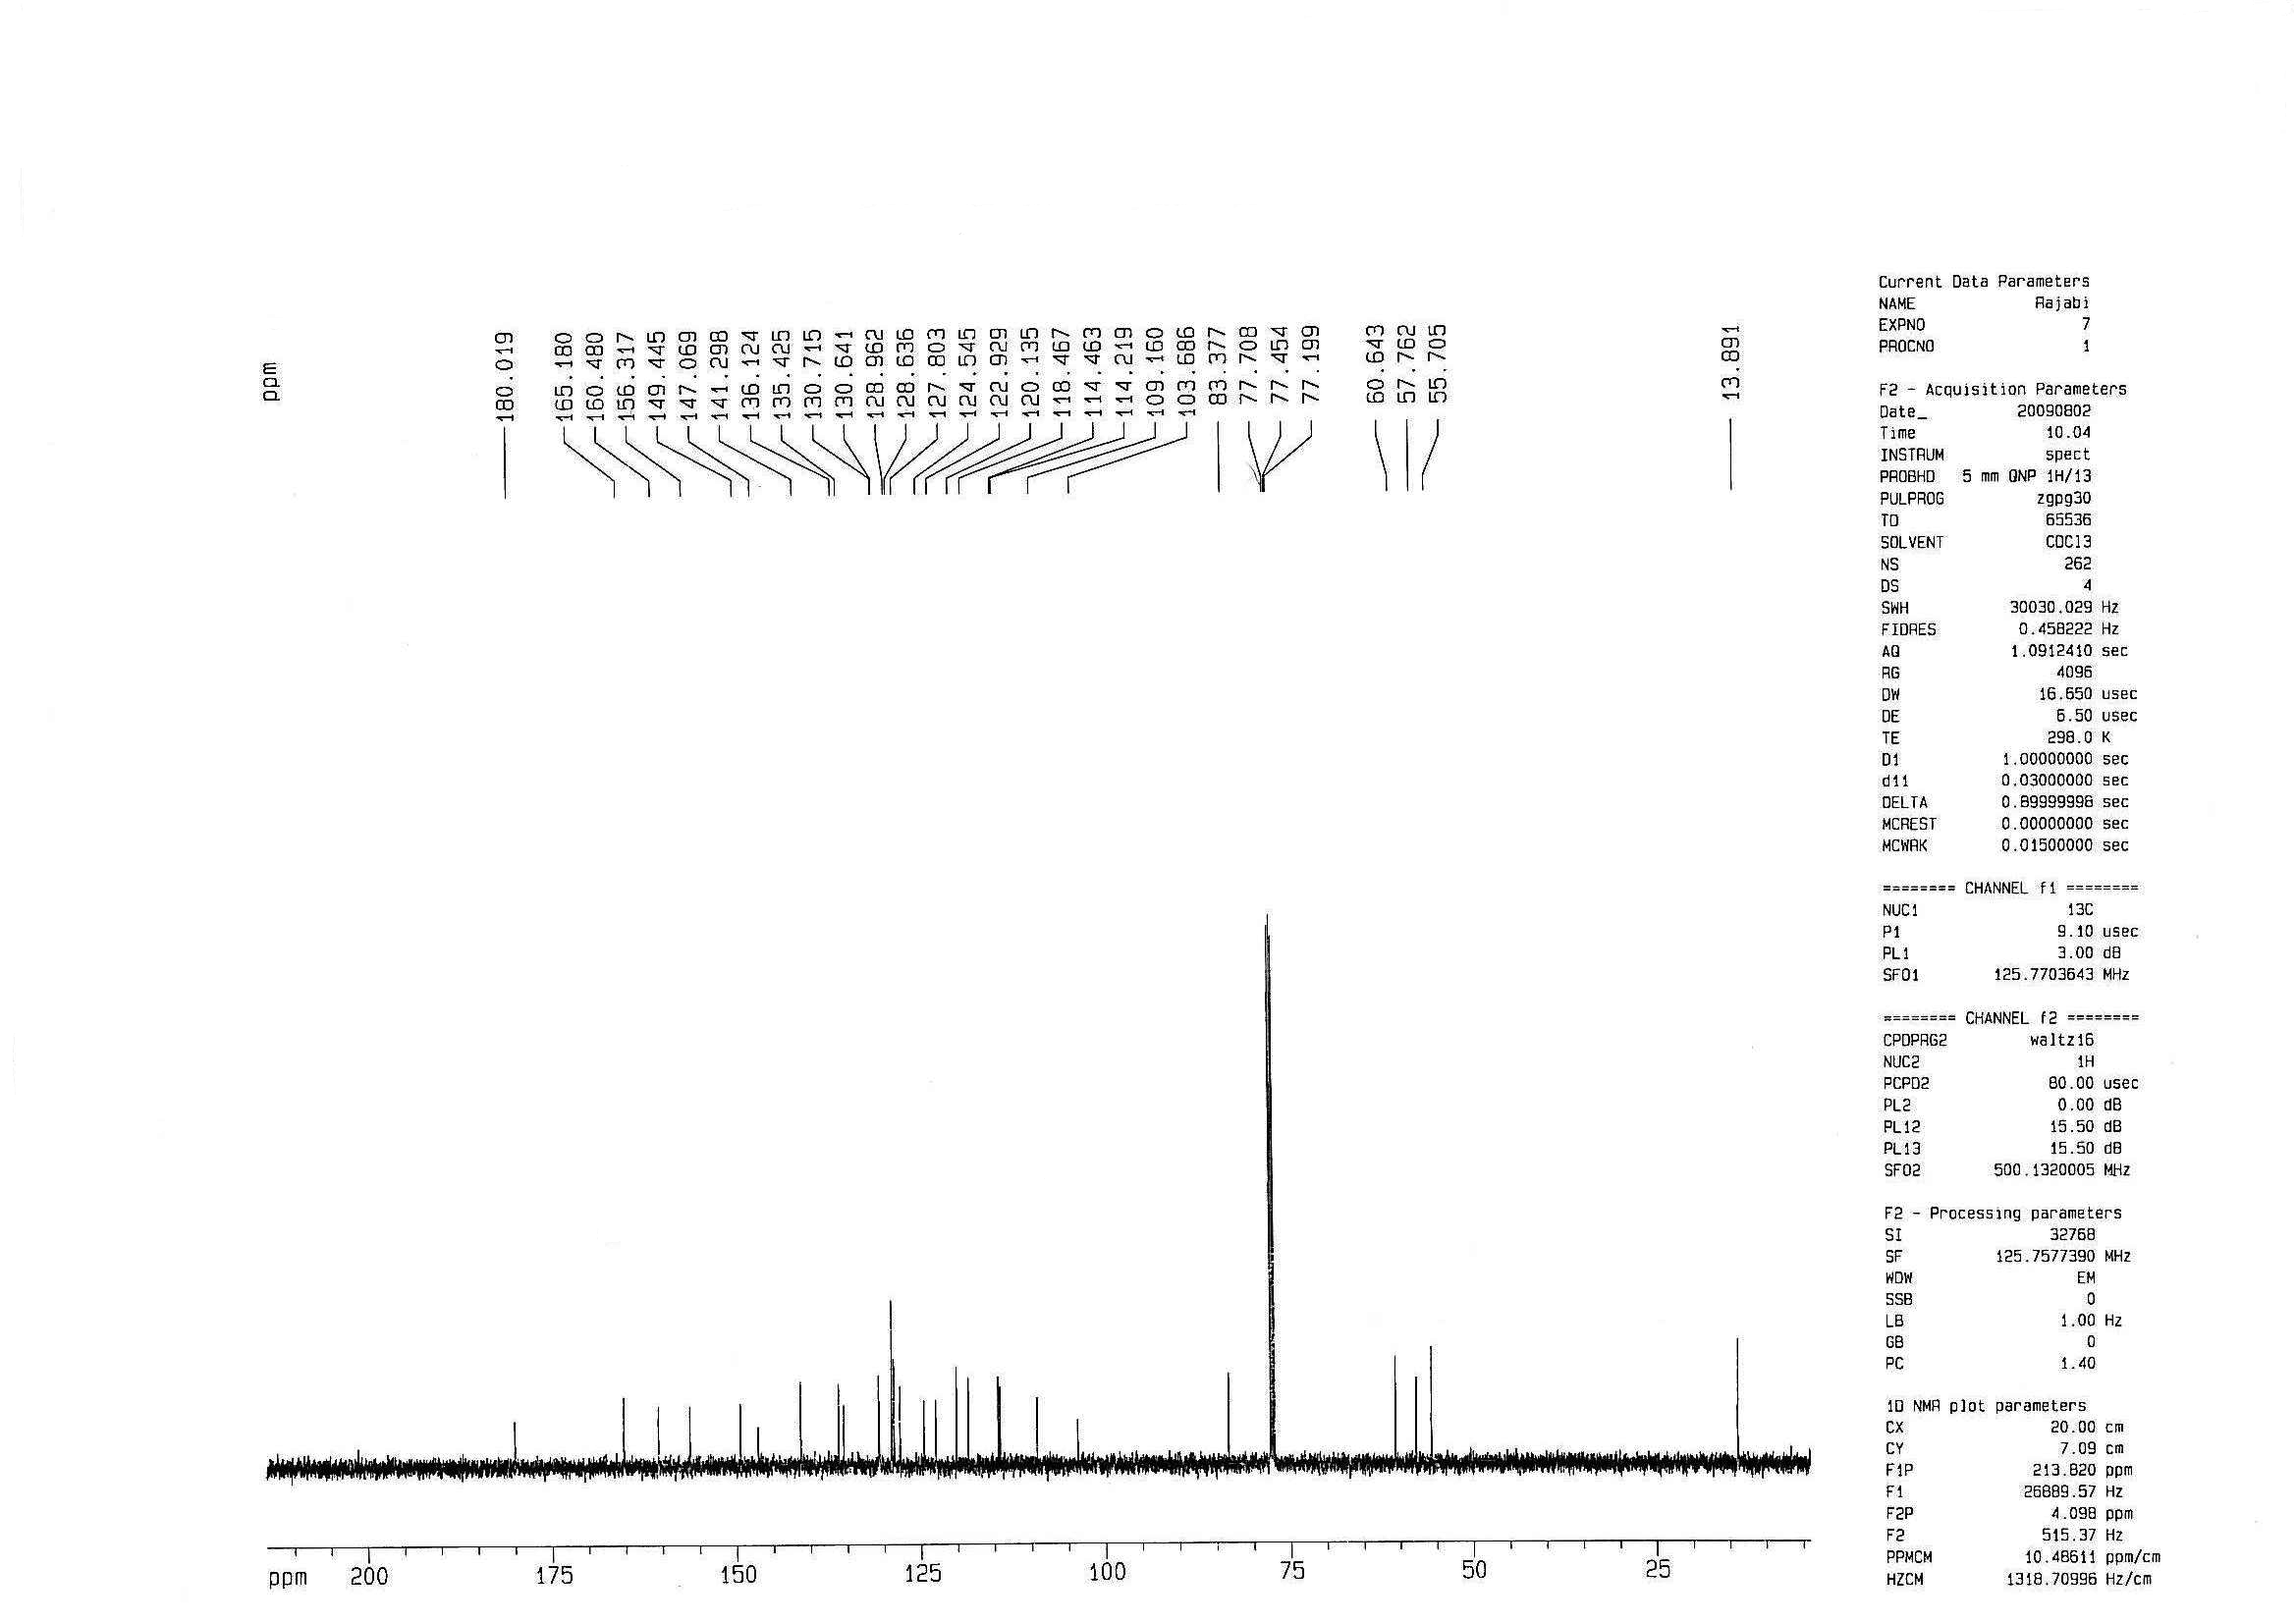
**

**Ethyl-2-(4-methoxyphenyl)-4-phenyl-7-(2-hydroxybenzoyl)-4*H*-pyrimido[1,2-*a*] pyrimidine-3-carboxylate (6c):**

Crystal yellow; m.p: 256-257 oC; IR (KBr, cm-1): 3322 (OH), 3148 (CH-Ar), 2950 (CH-Aliphatic), 1663 (CO); 1H NMR (400 MHz, CDCl3): δ = 0.82 (t, , *j* = 8.0 Hz, 3H, CH3), 3.48 (s, 3H, OCH3), 3.88 (q, 2H, CH2), 5.47 (s, 1H, H-a), 5.91 (s, 1H, H-b), 6.04 (s, 1H, H-c), 7.13 (d, *J* = 7.2 Hz, 2H, H-Ar), 7.22 (d, *j* = 6.8 Hz, 2H, H-Ar), 7.74-7.56(m, 8H, H-Ar), 7.92 (d, *J* = 8.0 Hz, 1H, H-Ar), 11.95 (s, 1H, OH); 13C NMR (100.6 Hz, CDCl3): δ = 14.2, 52.5, 56.3, 60.1, 84.9, 102.7, 108.2, 118.1, 122.5, 124.2, 127.4, 127.6, 128.3, 128.6, 129.2, 129.9, 130.2, 135.1, 135.7, 136.5, 139.2, 141.0, 146.5, 149.1, 156.9, 165.9, 179.5 ppm. anal. calcd for C30H25N3O5: C 70.99, H 4.96, N 8.28, O 15.76. Found: C 71.0, H 5.29, N 8.28, O 15.76.

**Ethyl-2-(2-nitrophenyl)-4-phenyl-7-(2-hydroxybenzoyl)-4*H*-pyrimido[1,2-*a*]pyrimidine-3-carboxylate (6d):**

Crystal yellow; m.p: 246-248 oC; IR (KBr, cm-1): 3452 (OH), 3070 (CH-Ar), 2981 (CH-Aliphatic), 1683 (CO); 1H NMR (500 MHz, CDCl3): δ = 0.82 (t, 3H, CH3), 3.85 (m, 2H, CH2), 5.45 (s, 1H, H-a), 6.09 (s, 1H, H-b), 6.76 (s, 1H, H-c), 7.13 (t, 1H, H-Ar), 7.35 (m, 2H, H-Ar), 7.43-7.56 (m, 5H, H-Ar), 7.58 (t, 1H, H-Ar), 7.71 (t, 1H, H-Ar), 7.88 (d, *J* = 6.92 Hz, 1H, H-Ar), 7.93 (d, *J* = 7.82 Hz, 1H, H-Ar), 7.98 (d, *j* = 6.84 Hz, 1H, H-Ar), 10.43 (s, 1H, OH); 13C NMR (125 MHz, CDCl3): δ = 13.9, 52.0, 60.9, 83.0, 103.9, 109.8, 119.1, 123.2, 124.4, 124.5, 127.5, 128.3, 129.1, 129.8, 130.3, 134.4, 136.4, 136.5, 148.8, 150.0, 156.7, 164.3, 180.4 ppm; anal. calcd for C29H22N4O6: C 66.66, H 4.24, N 10.72, O 18.37. Found: C 66.67, H 4.23, N 10.72, O 18.37.


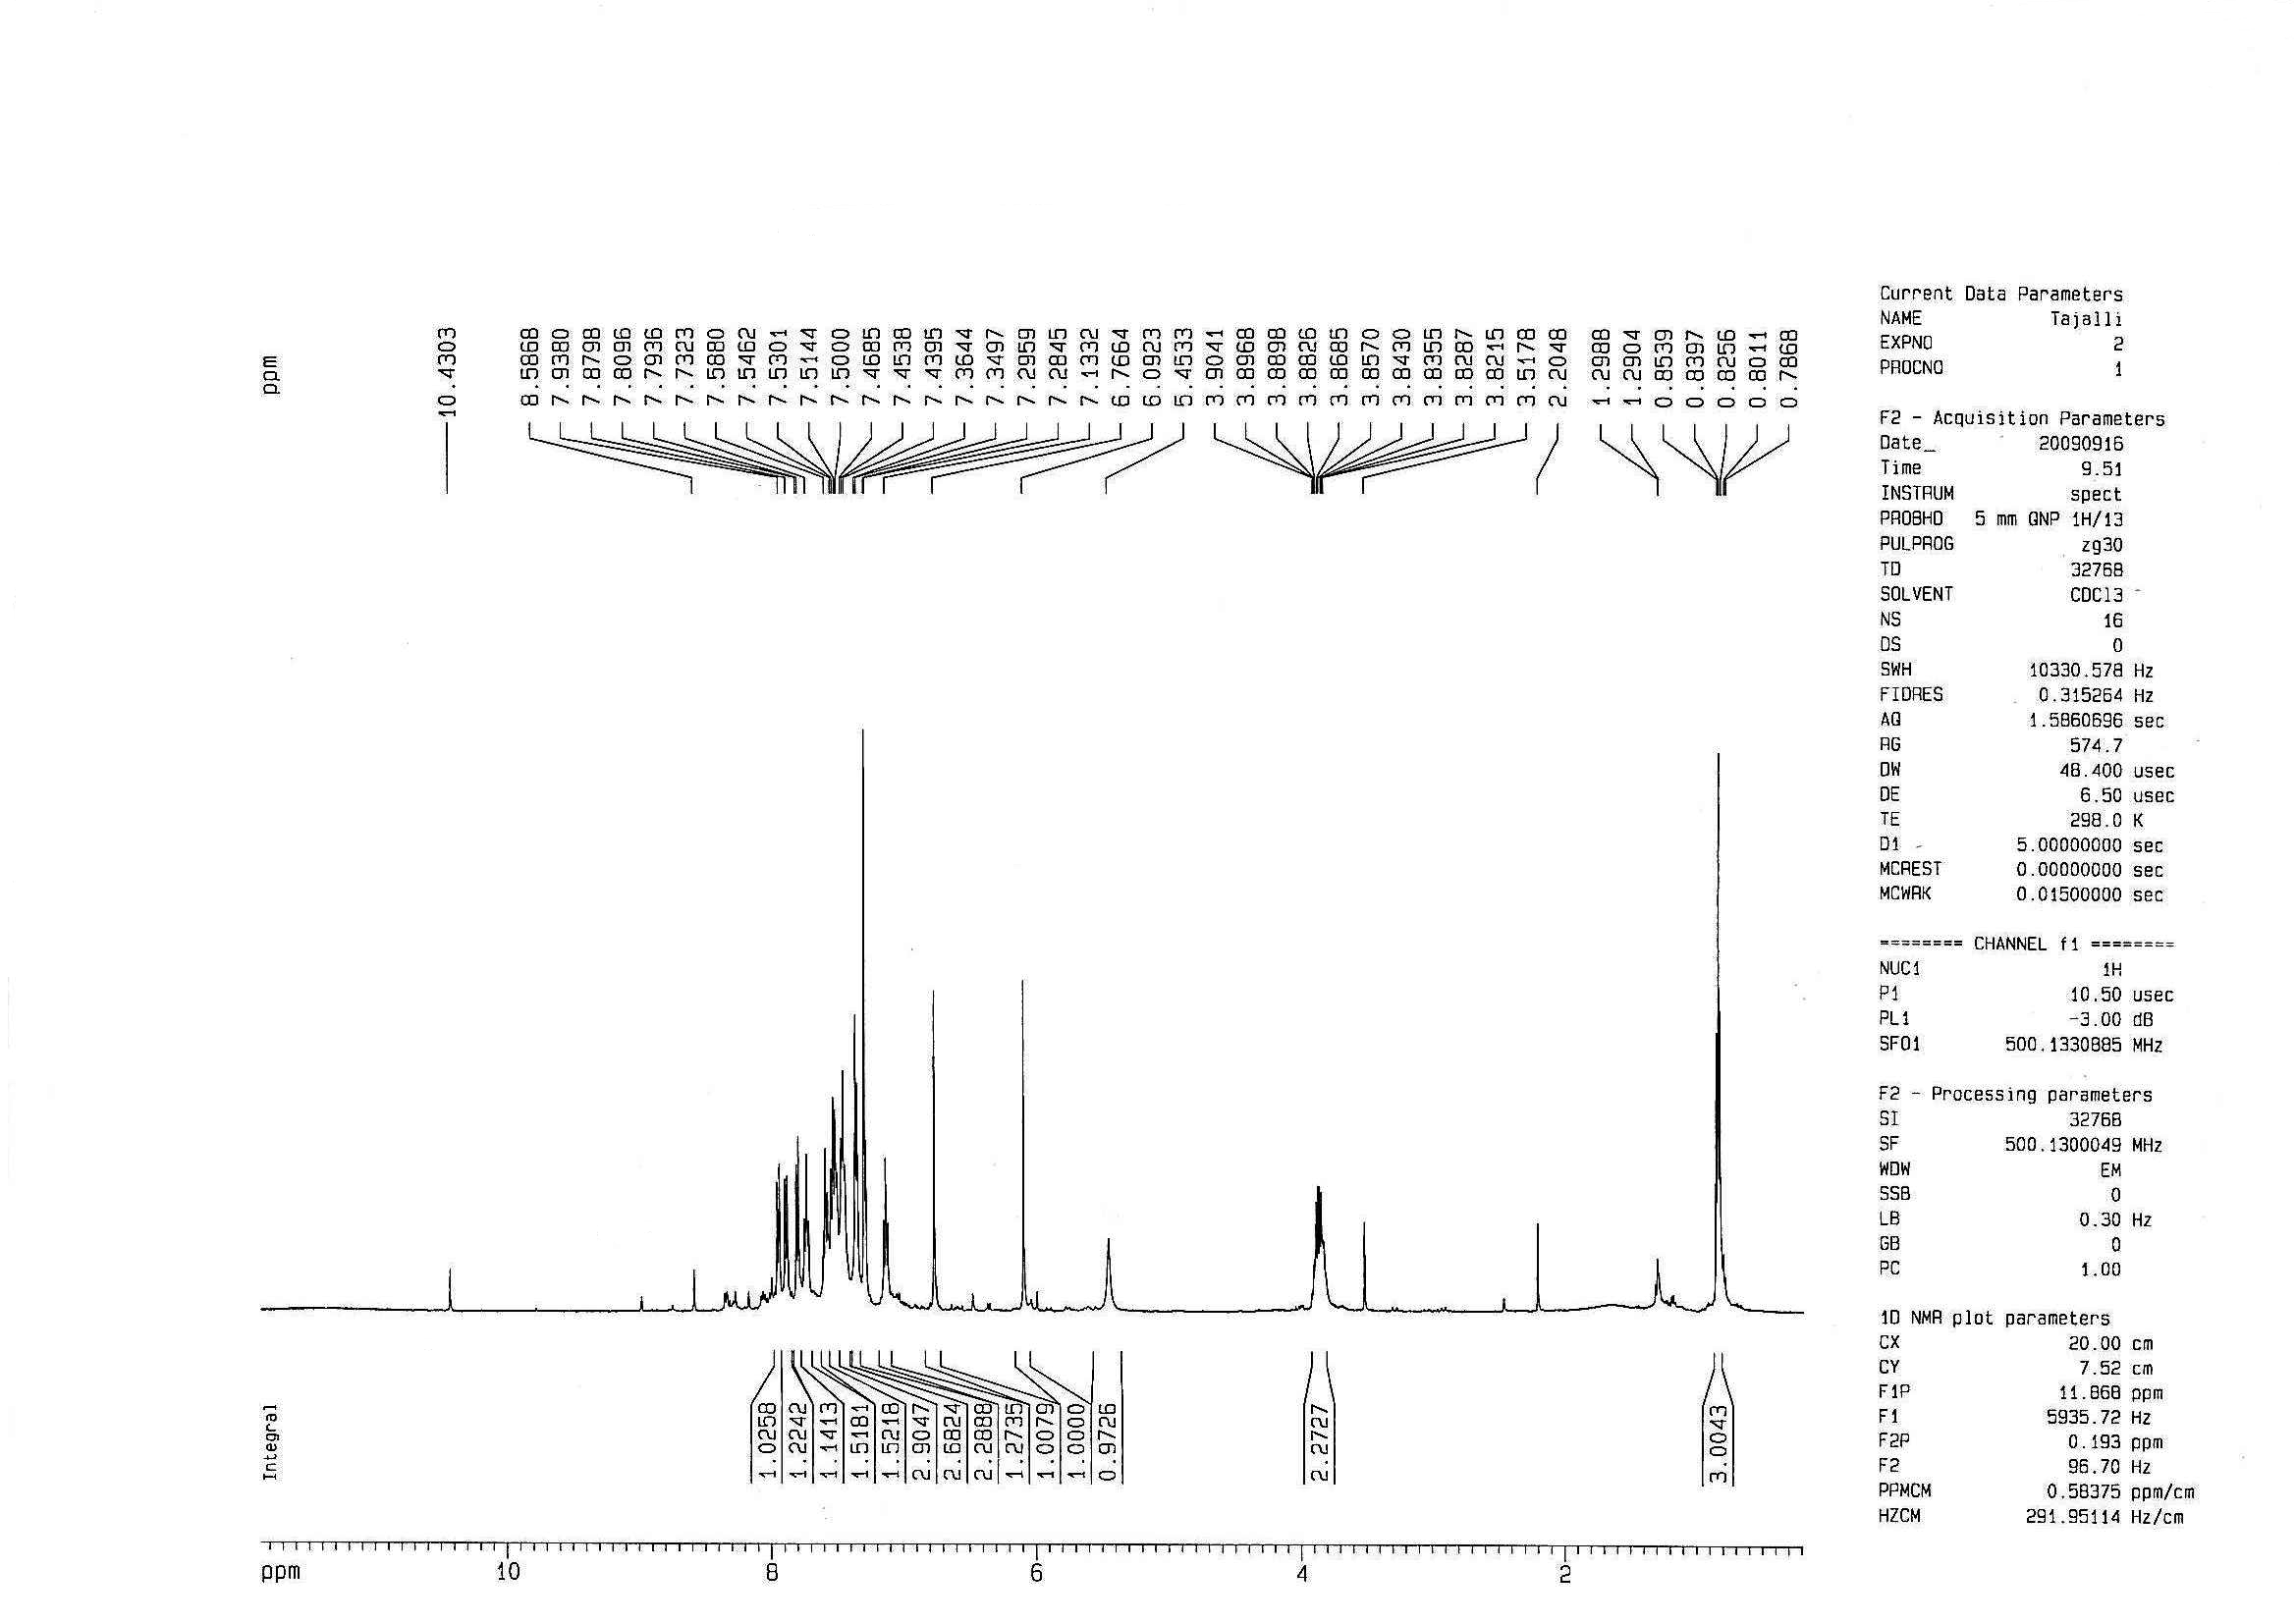

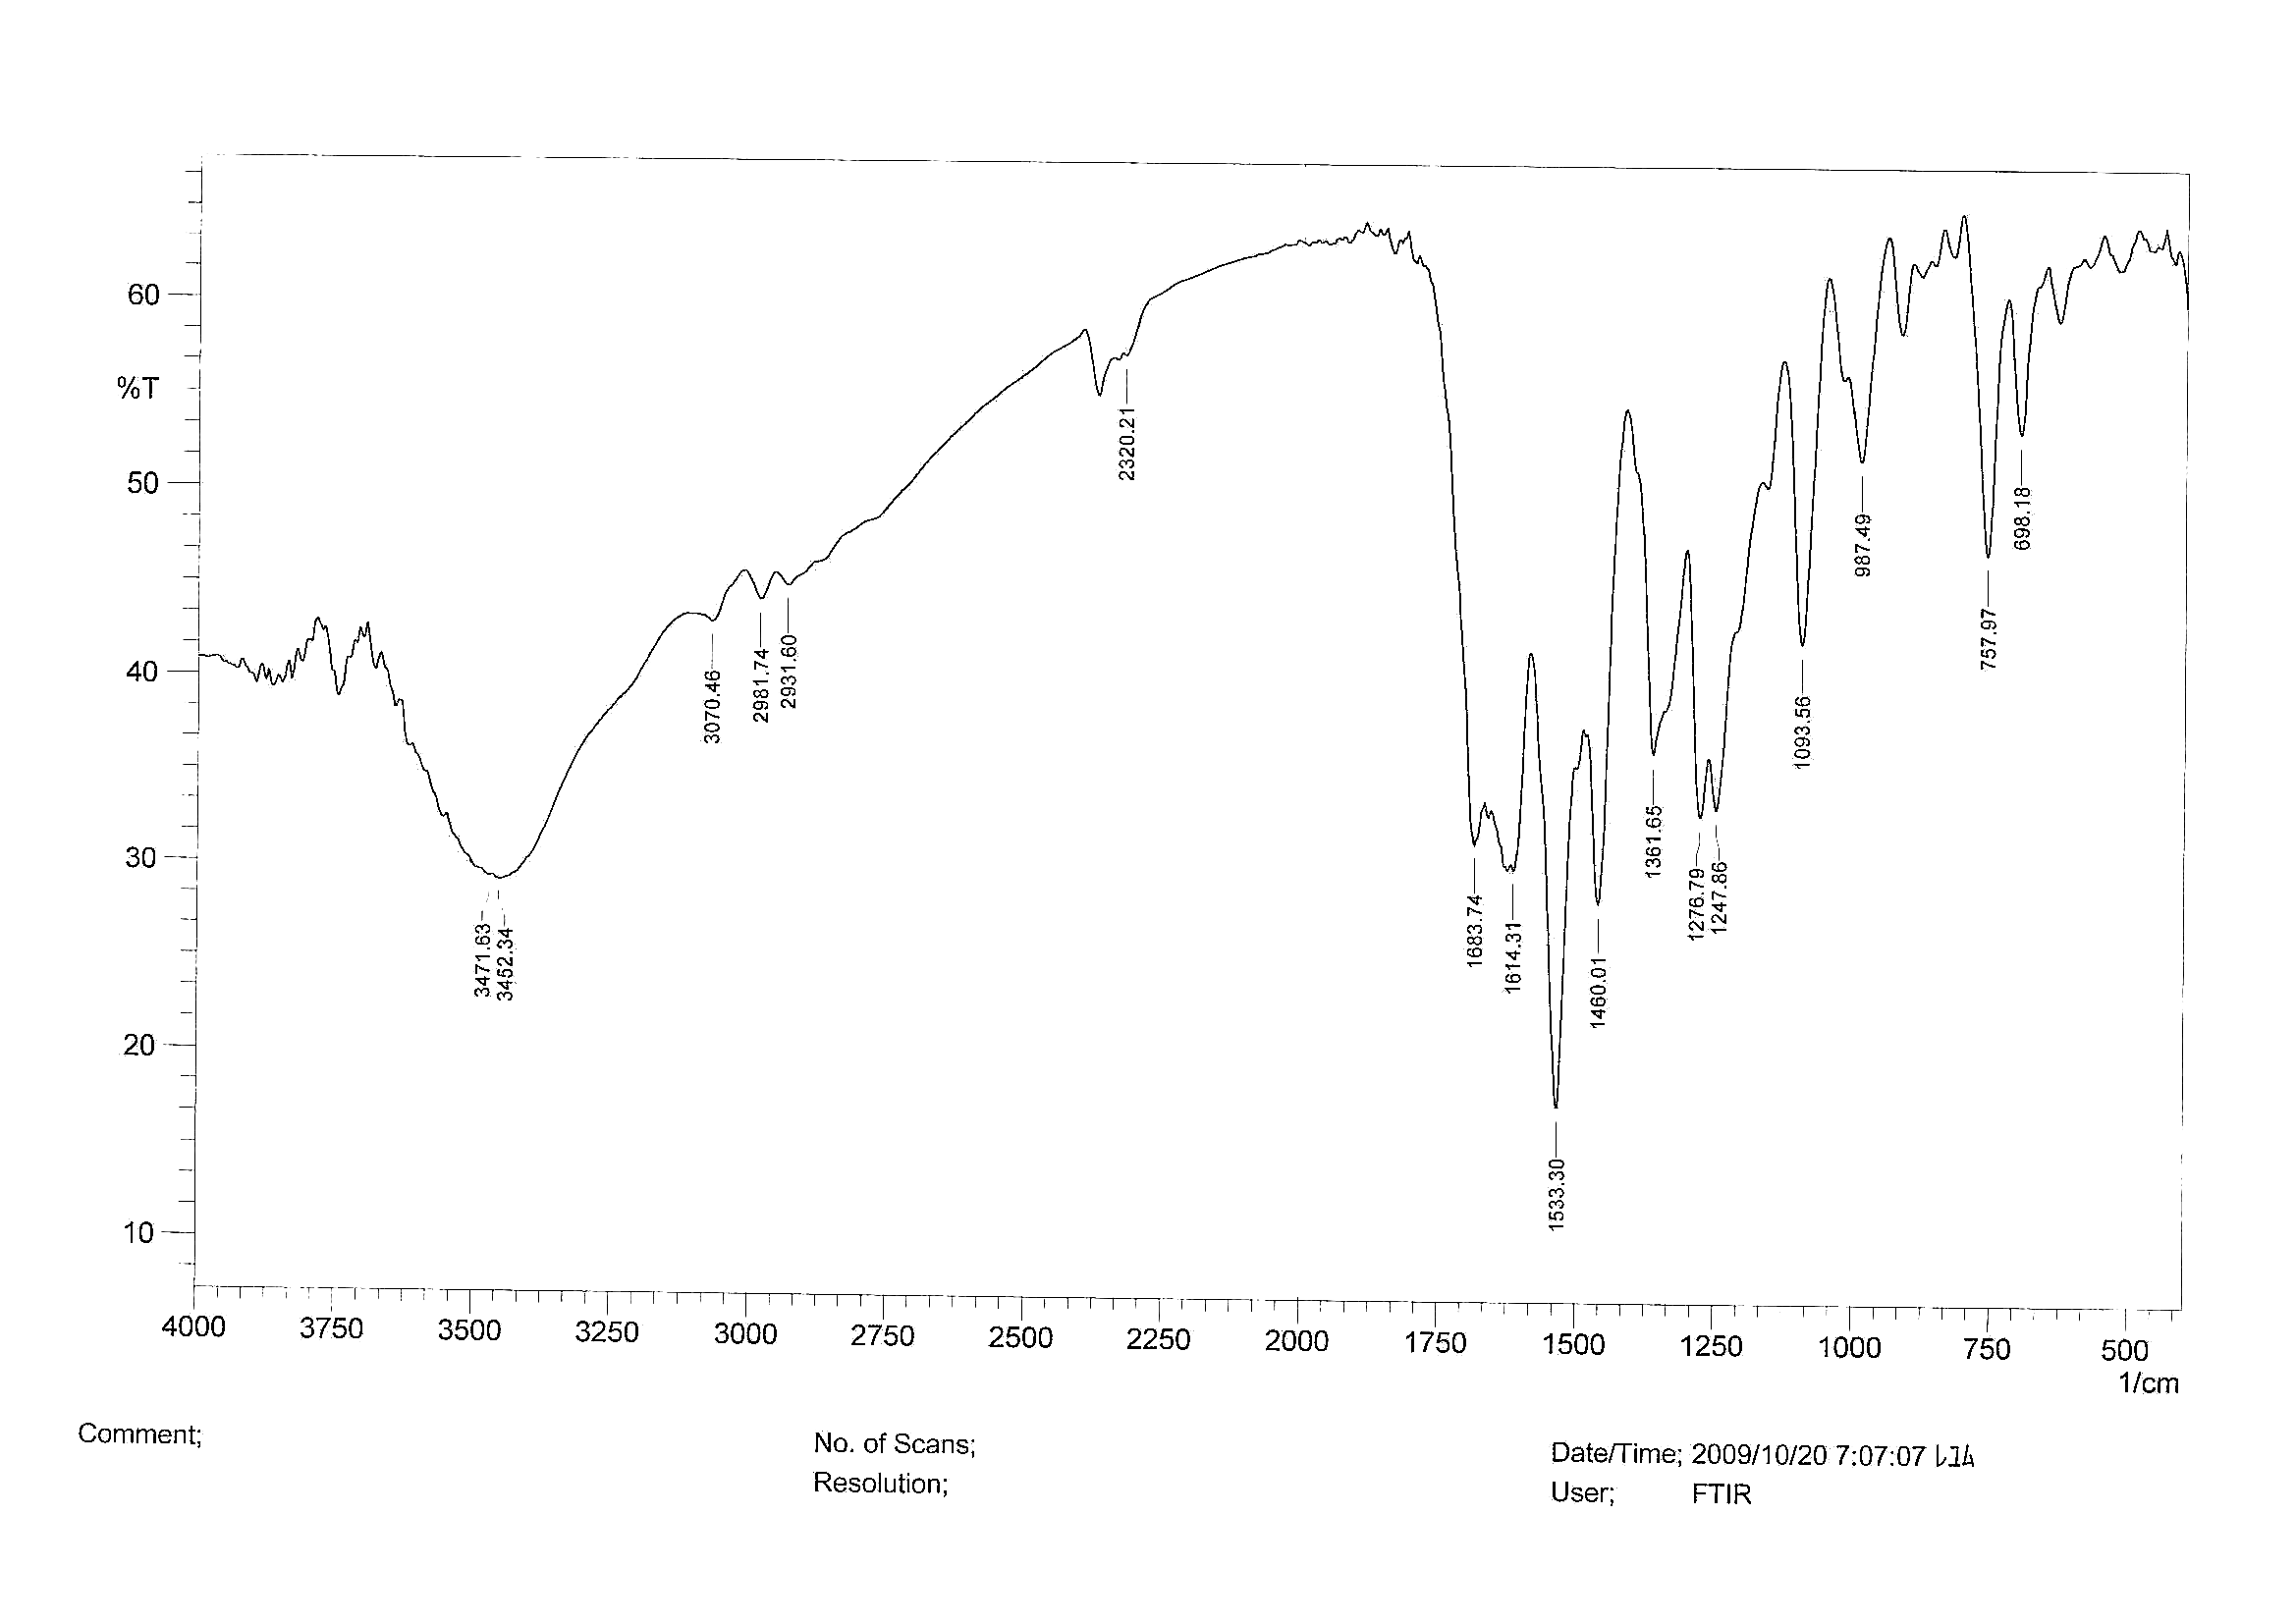


**
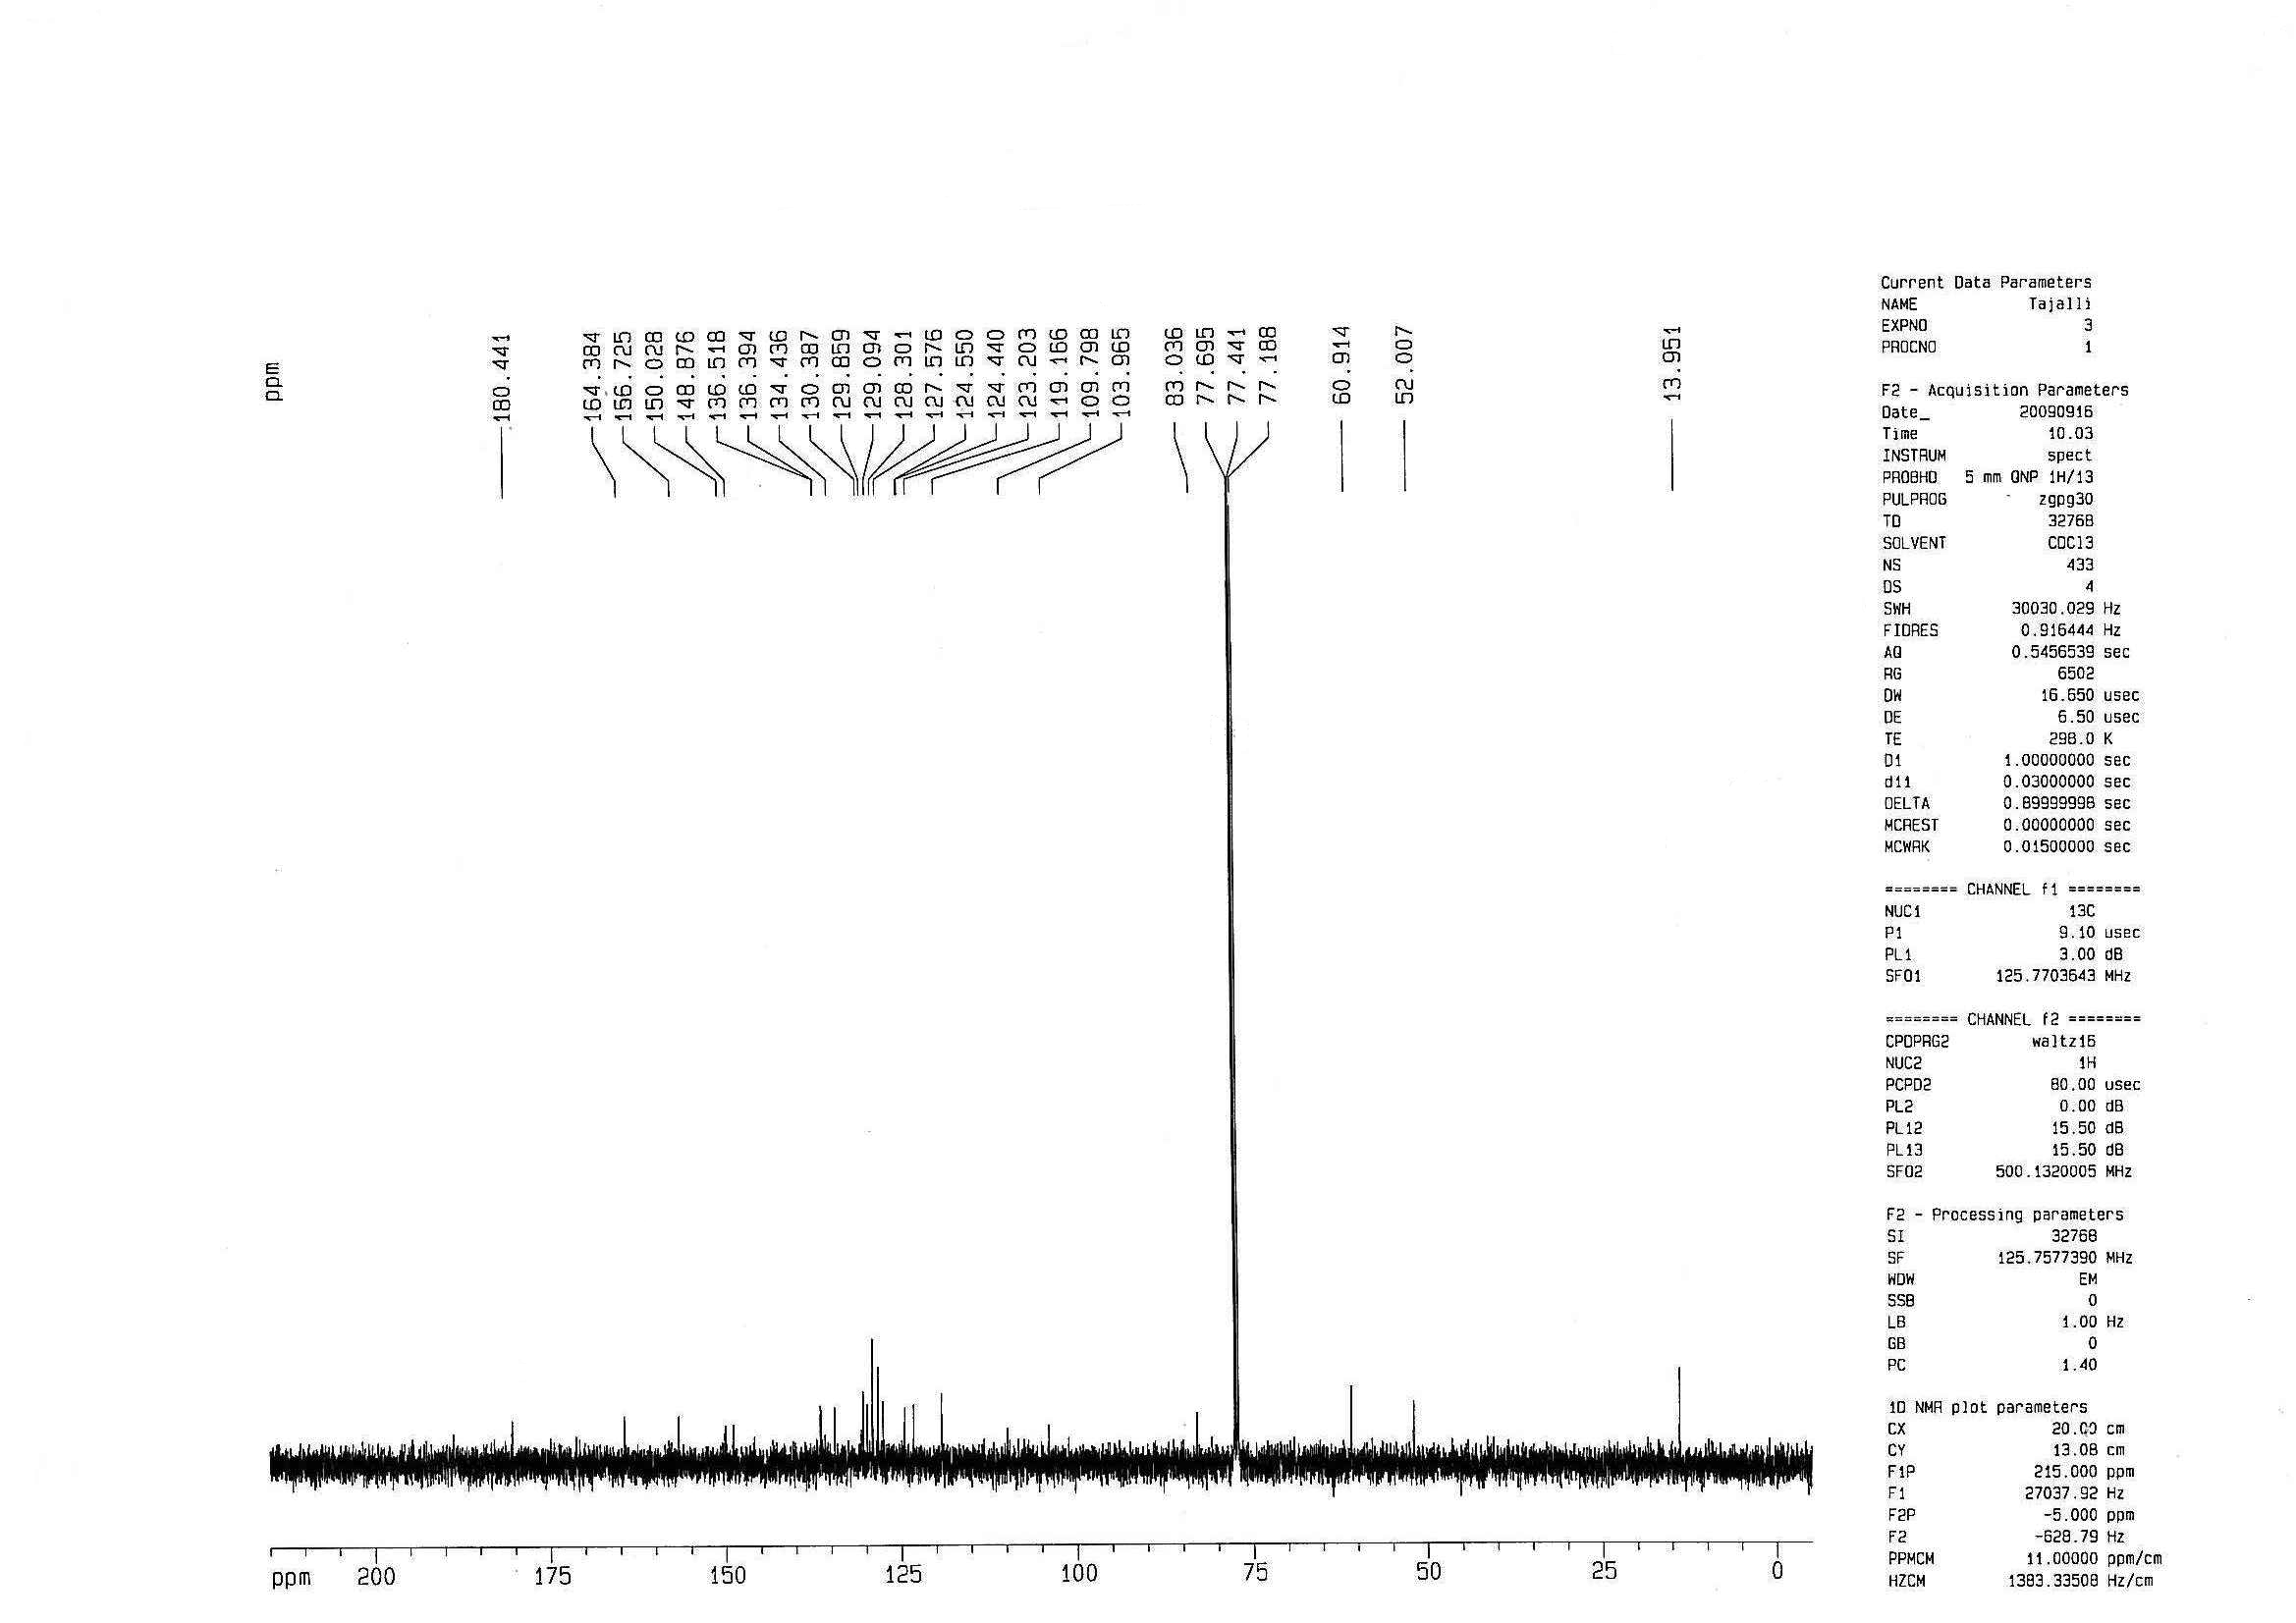
**

**Ethyl-2-(4-chlorophenyl)-4-phenyl-7-(2-hydroxybenzoyl)-4*H*-pyrimido[1,2-*a*]pyrimidine -3-carboxylate (6e):**

Crystal yellow; m.p: 262-264 oC; IR (KBr, cm-1): 3456 (OH), 3095 (CH-Ar), 2975 (CH-Aliphatic), 1677 (CO); 1H NMR (500 MHz, CDCl3): δ = 0.82 (t, 3H, CH3), 3.87 (q, 2H, CH2), 5,49 (s, 1H, H-a), 5.91 (s, 1H, H-b), 5.97 (s, 1H, H-c), 7.08 (d, *J* = 8.18 Hz, H-Ar), 7.12 (t, 1H, H-Ar), 7.37 (m, 4H, H-Ar), 7.44 (m, 4H, H-Ar), 7.53 (m, 2H, H-Ar), 7.90 (dd, *J* = 1.6, 7.85 Hz, 1H, H-Ar); 13C NMR (125 MHz, CDCl3): δ = 13.8, 57.2, 60.7, 83.1, 103.5, 109.2, 118.4, 123.1, 124.4, 127.8, 128.5, 128.9, 129.4, 129.8, 130.7, 135.4, 135.6, 136.2, 138.3, 140.7, 147.4, 149.1, 156.2, 165.1, 179.8 ppm. anal. calcd for C29H22ClN3O4: C, 68.04; H, 4.33; Cl, 6.93; N, 8.21; O, 12.50. Found: C, 68.02; H, 4.35; Cl, 6.93; N, 8.21; O, 12.50.

**
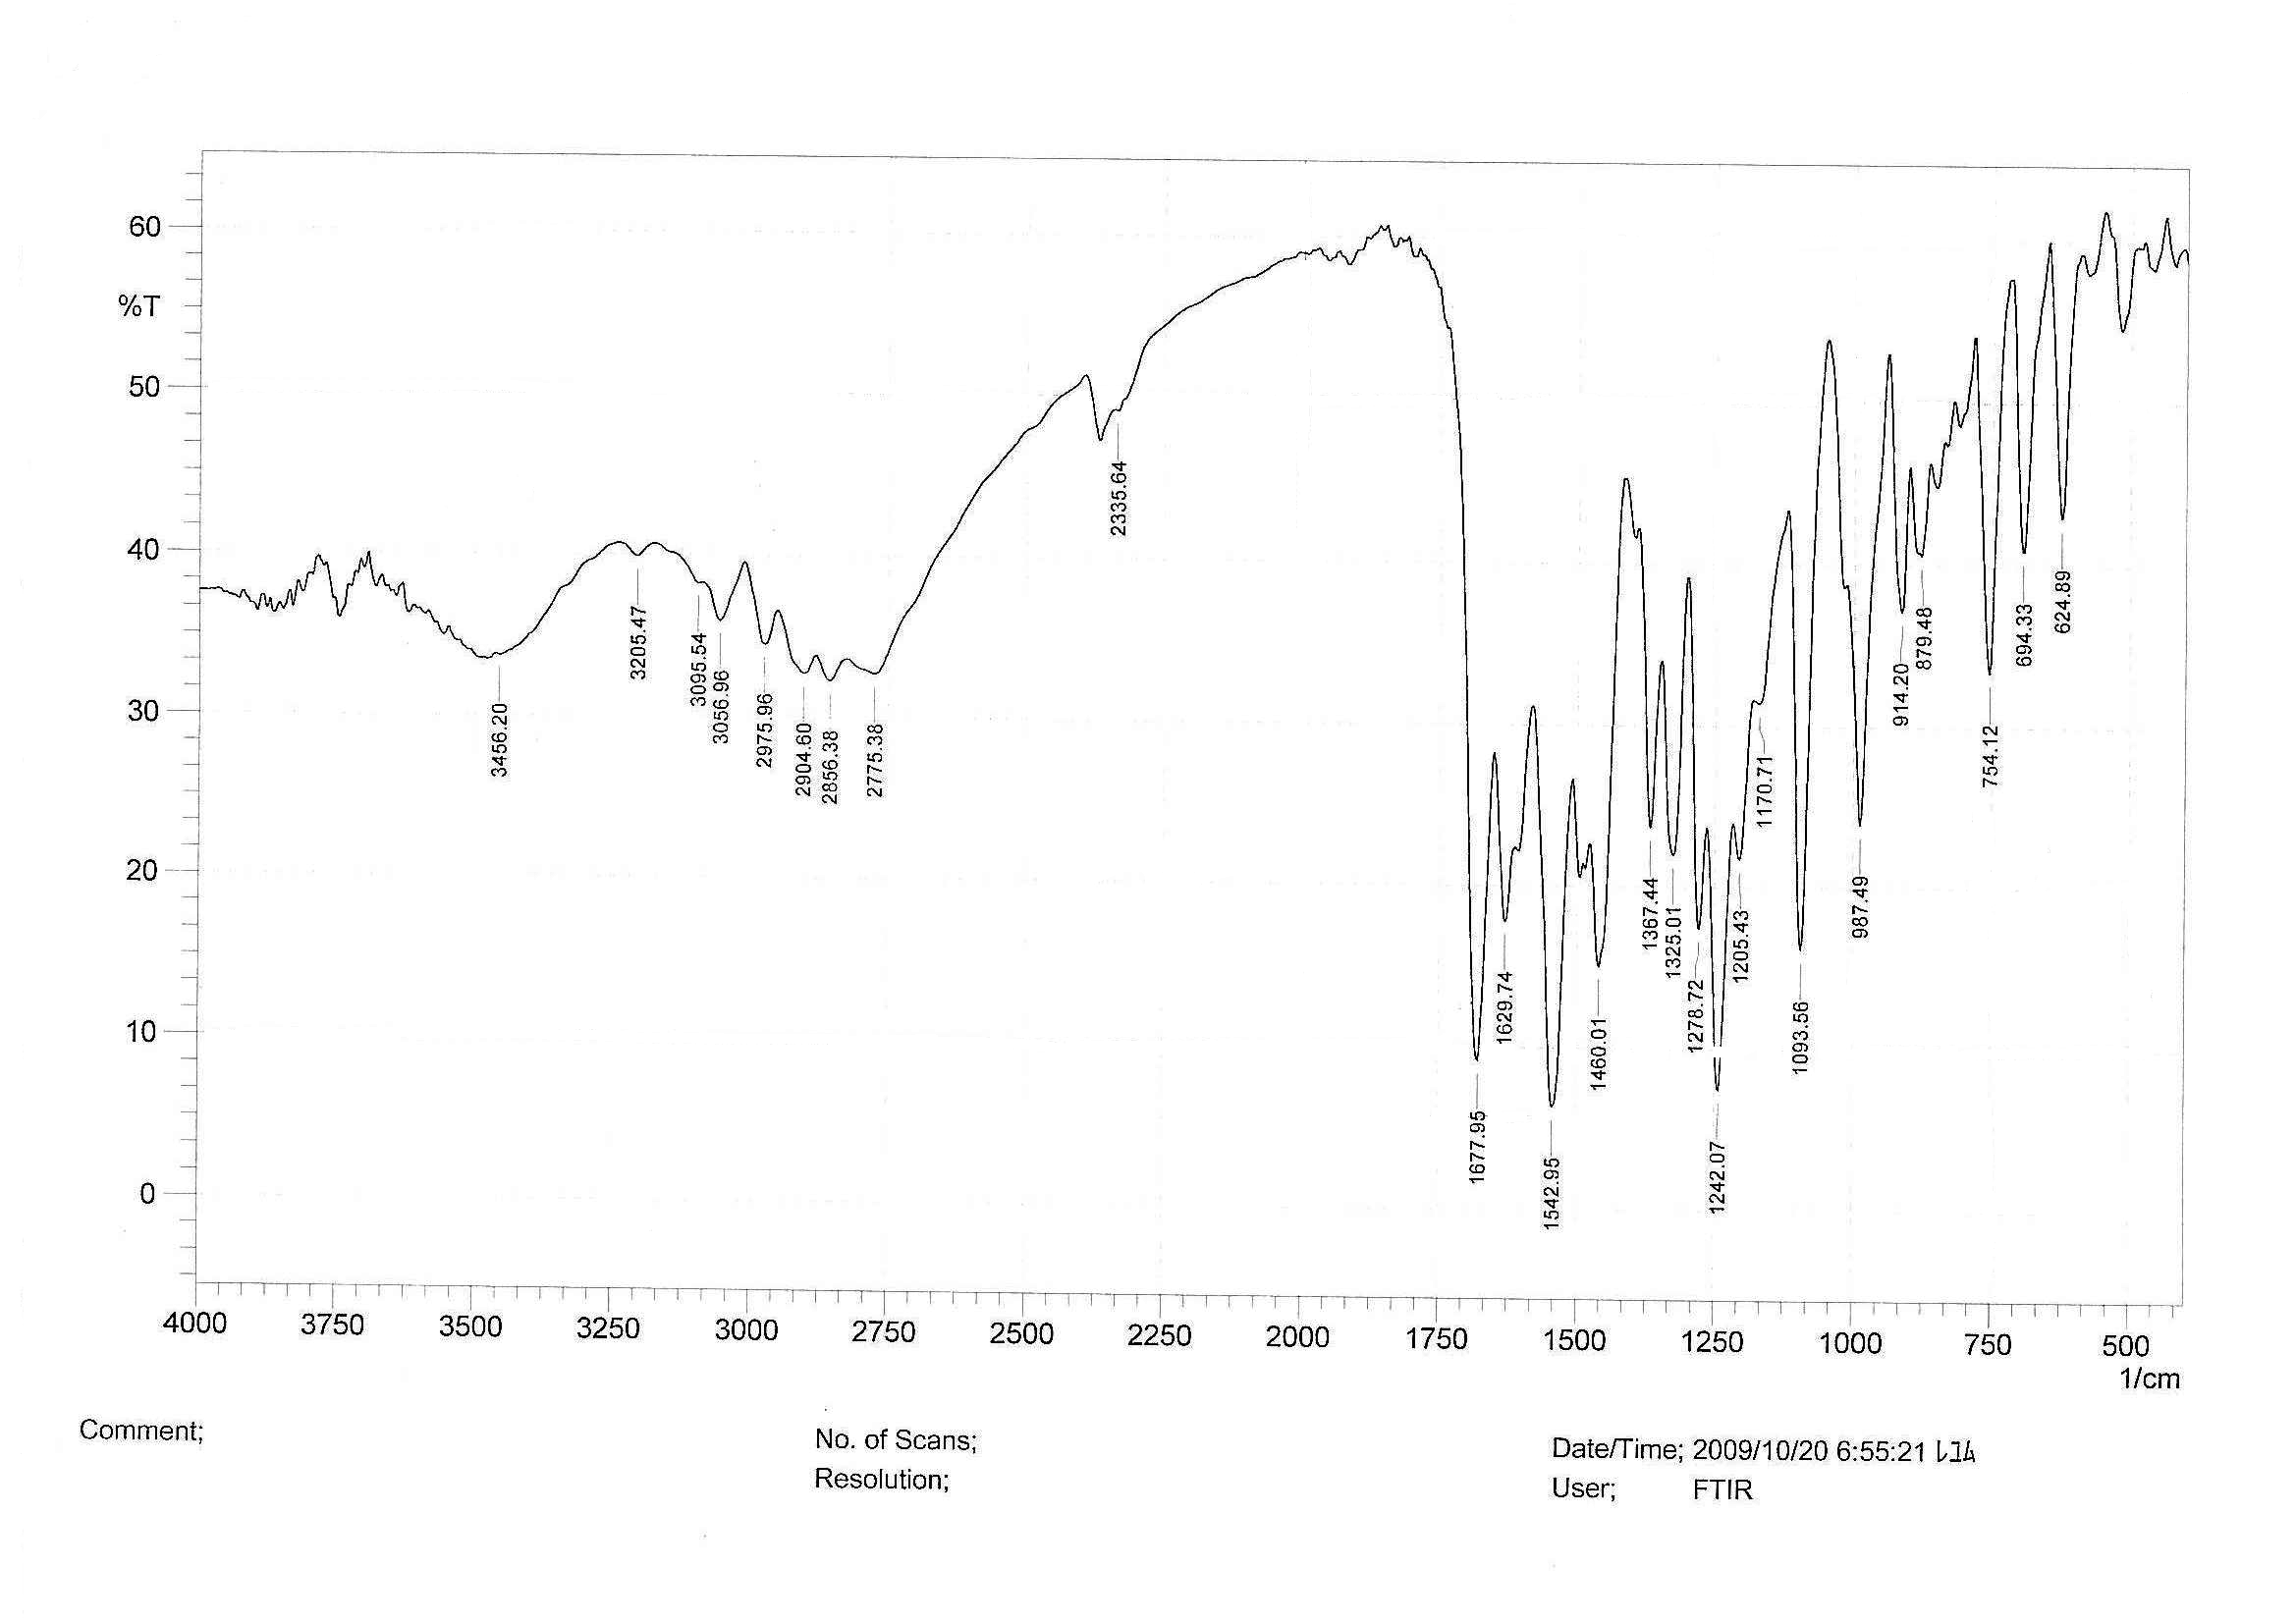

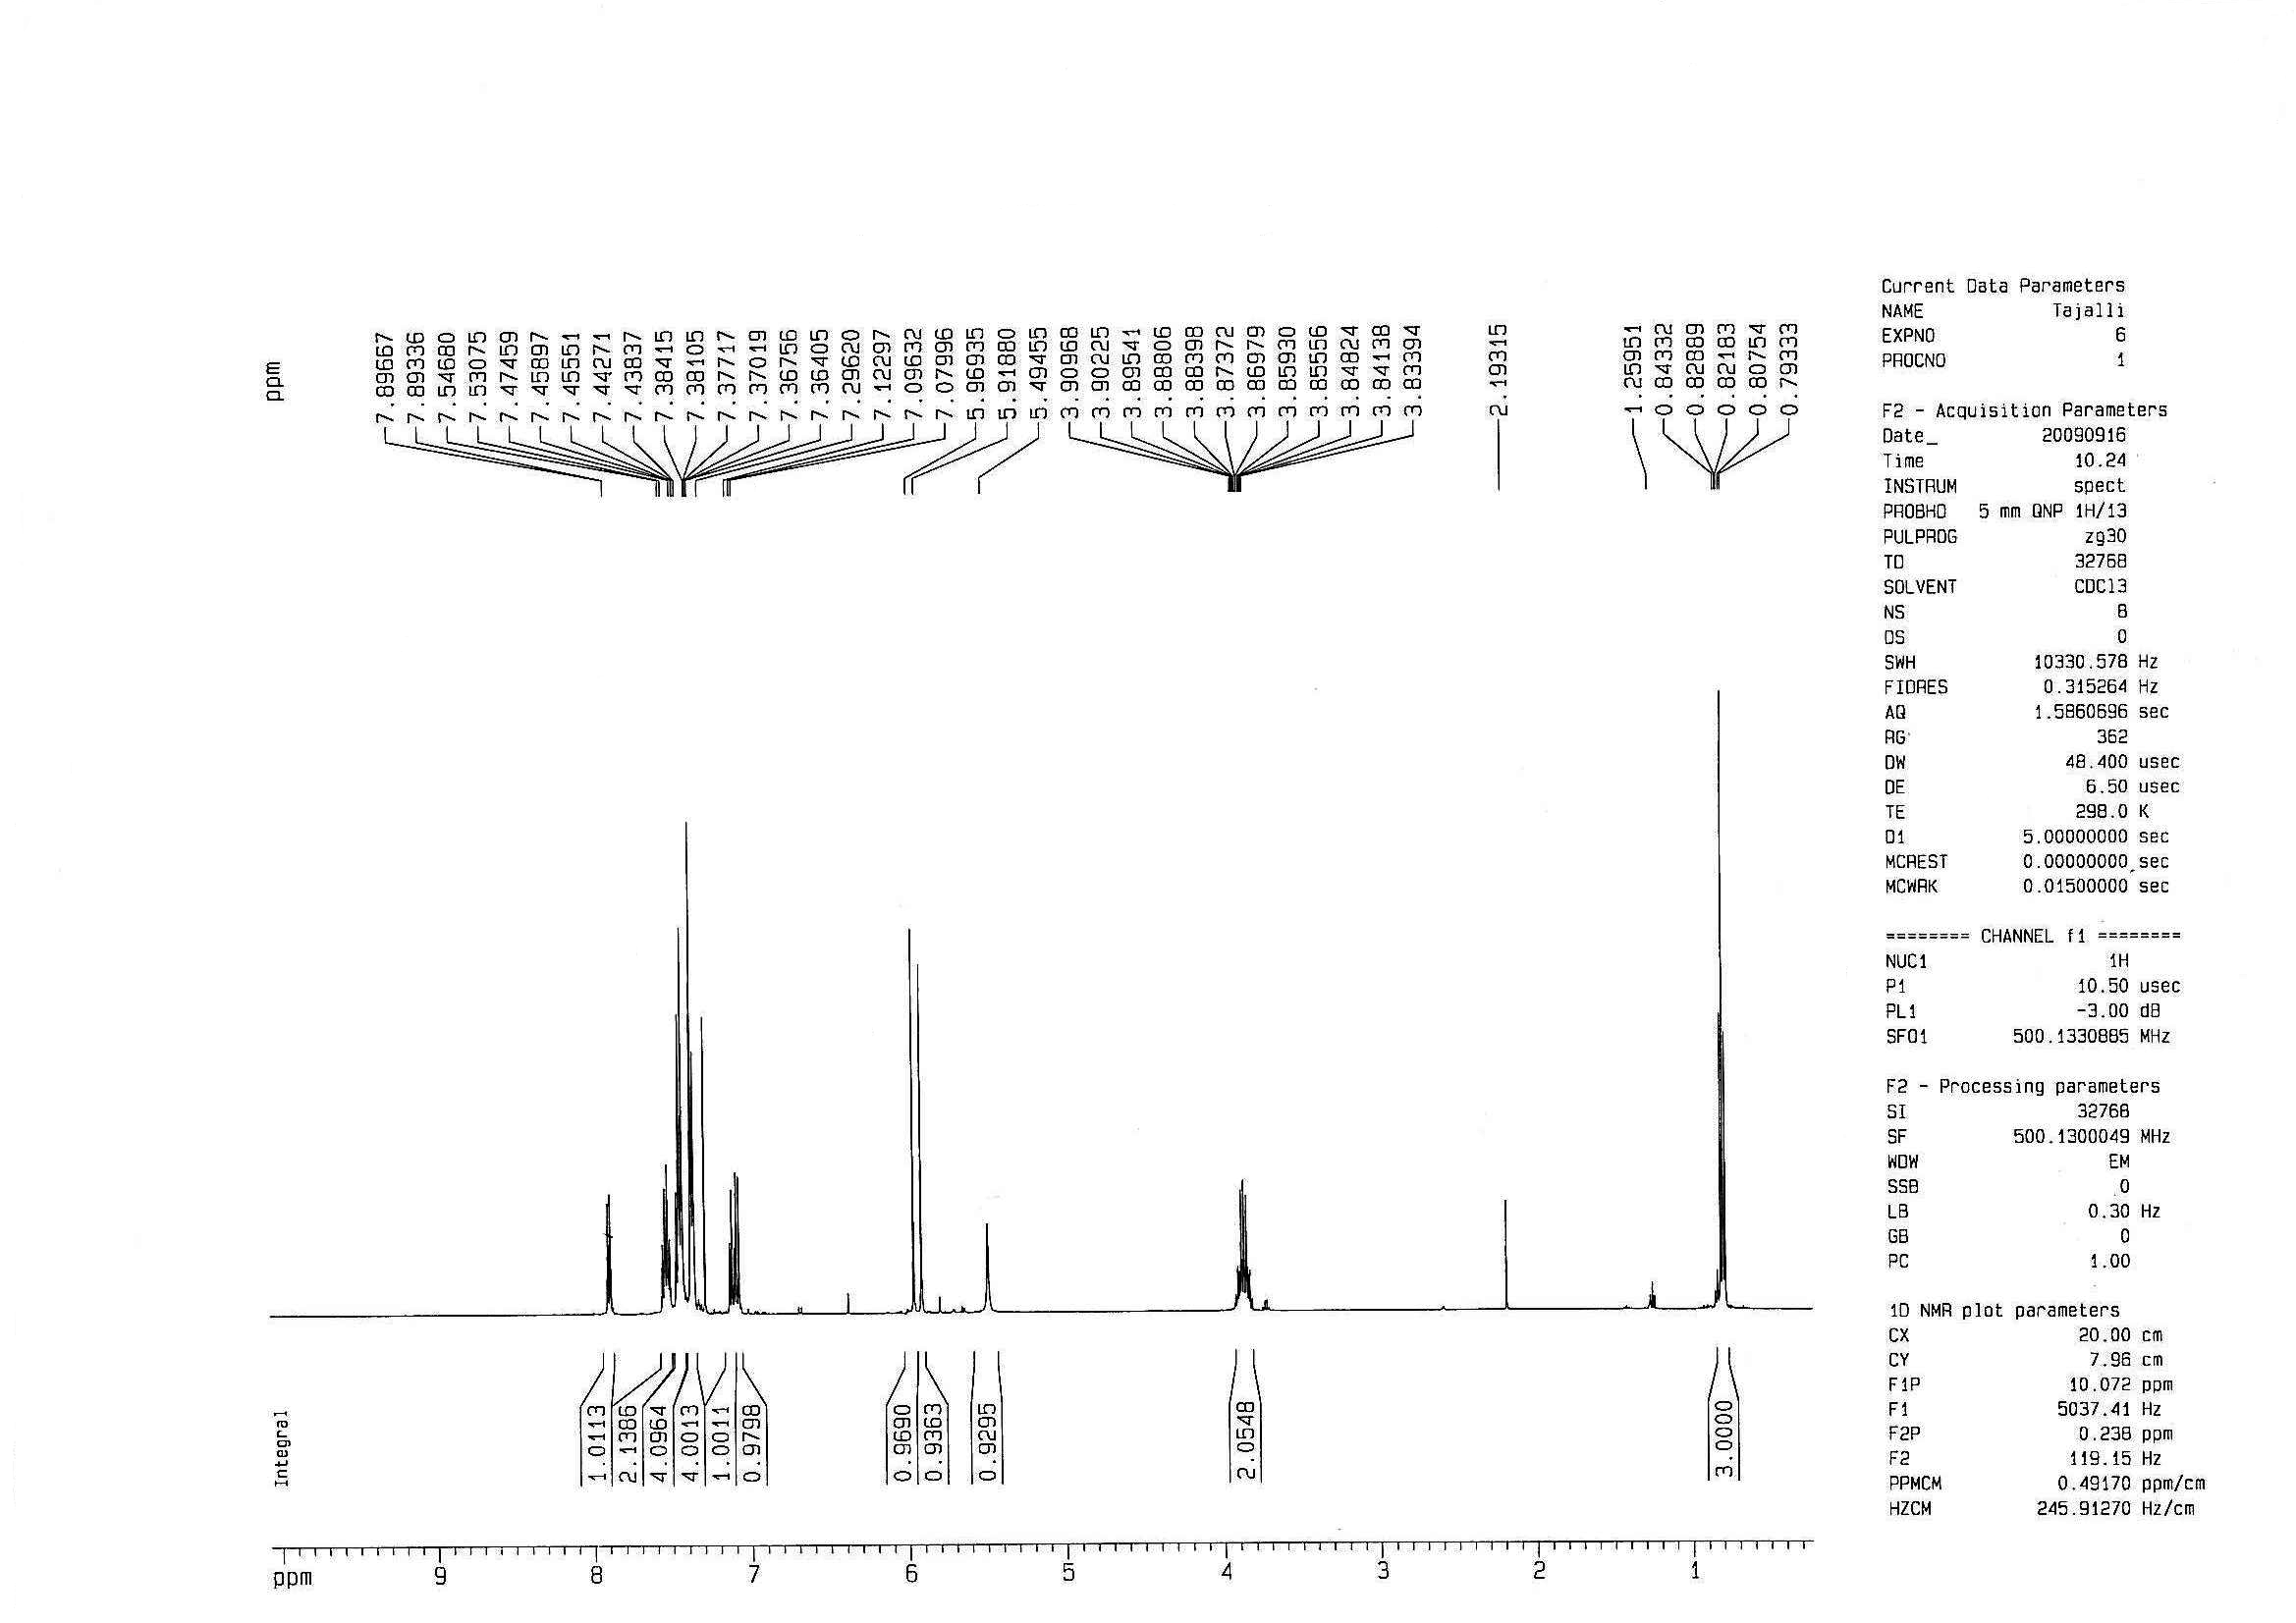
**

**
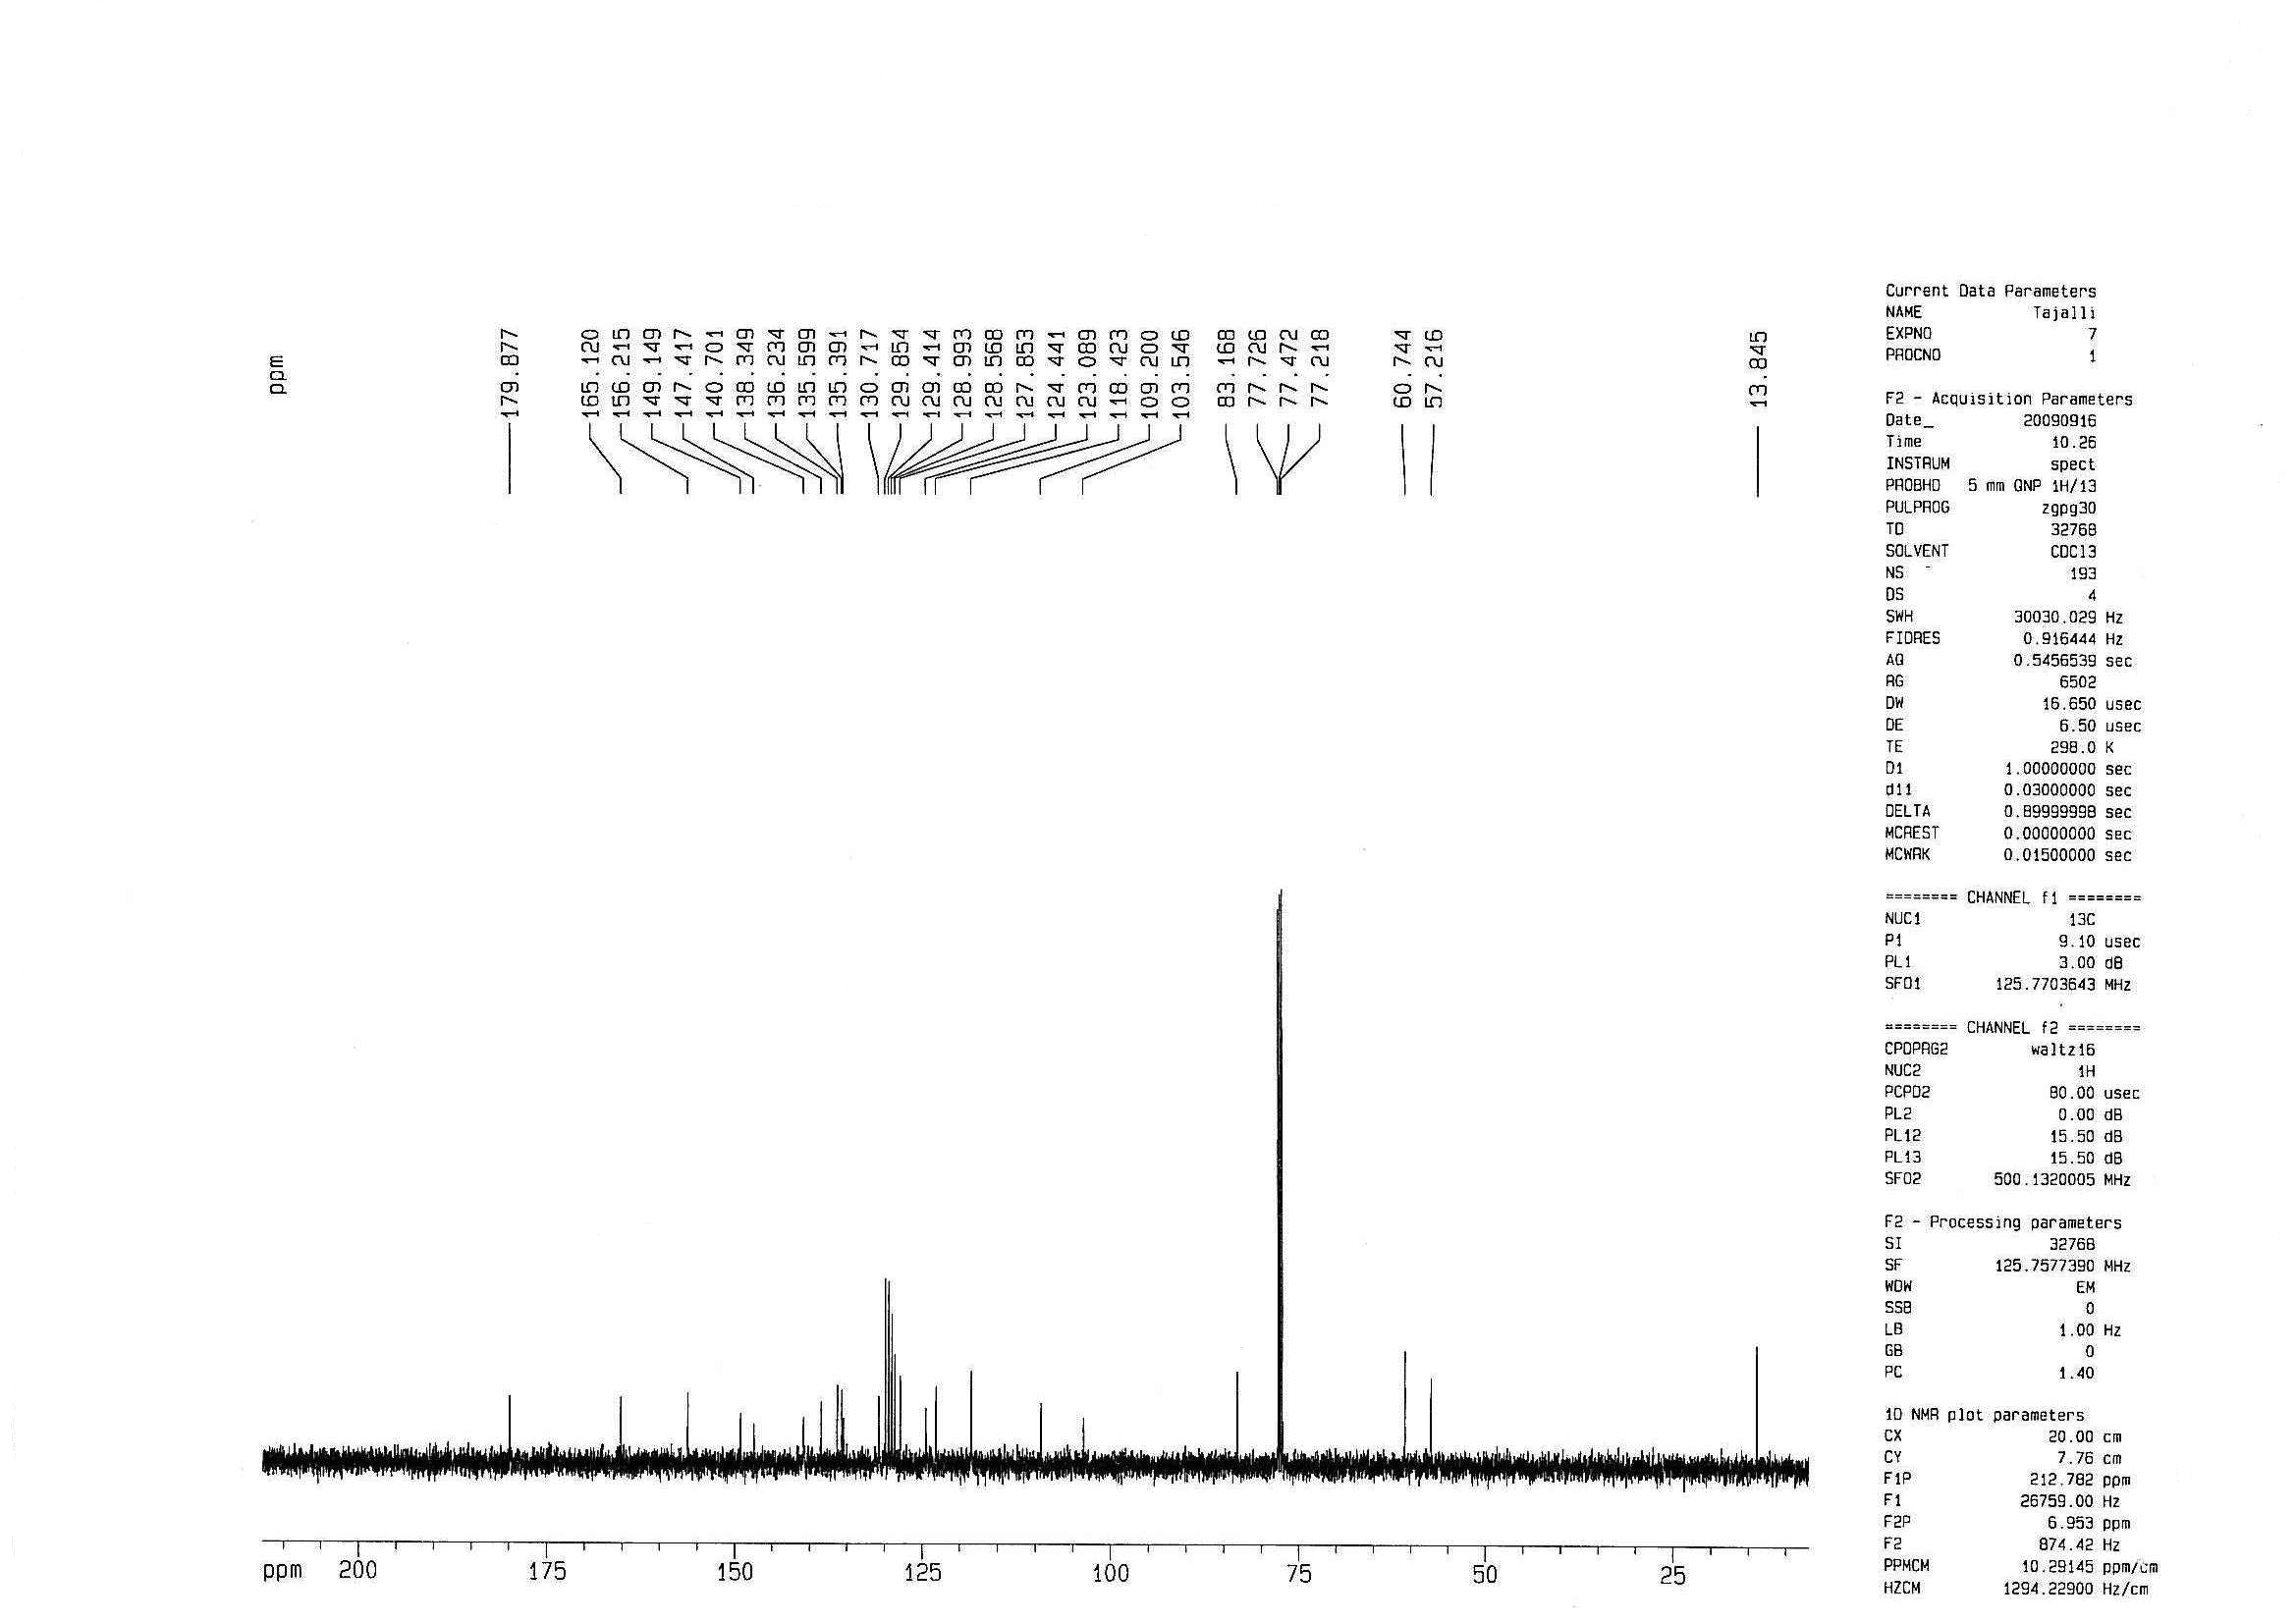
**

**Ethyl-2-(4-boromophenyl)-4-phenyl-7-(2-hydroxybenzoyl)-4*H*-pyrimido[1,2-*a*] pyrimidine-3-carboxylate (6f):**

Crystal yellow; m.p: 265-267 oC; IR (KBr, cm-1): 3458 (OH), 3095 (CH-Ar), 2975 (CH-Aliphatic), 1677 (CO); 1H NMR (500 MHz, CDCl3): δ = 0.82 (t, 3H, CH3), 3.88 (q, 2H, CH2), 5.40 (s, 1H, H-a), 5.91 (s, 1H, H-b), 5.97 (s, 1H, H-c), 7.09 (d, *J* = 8.21 Hz, H-Ar), 7.13 (t, 1H, H-Ar), 7.39 (m, 4H, H-Ar), 7.47 (t, 2H, H-Ar), 7.54 (m, 4H, H-Ar), 7.91 (dd, *J* = 1.5, 7.82 Hz, 1H, H-Ar); 13C NMR (125 MHz, CDCl3): δ = 13.8, 57.3, 60.7, 83.2, 103.4, 109.2, 118.4, 123.1, 123.8, 124.4, 127.8, 128.5, 129.0, 129.7, 130.7, 132.8, 135.4, 136.2, 138.9, 140.7, 147.5, 149.2, 156.2, 165.1, 179.8 ppm. anal. calcd for C29H22BrN3O4: C, 62.60; H, 3.99; Br, 14.36; N, 7.55; O, 11.50. Found: C, 62.61; H, 3.98; Br, 14.36; N, 7.55; O, 11.50.

**
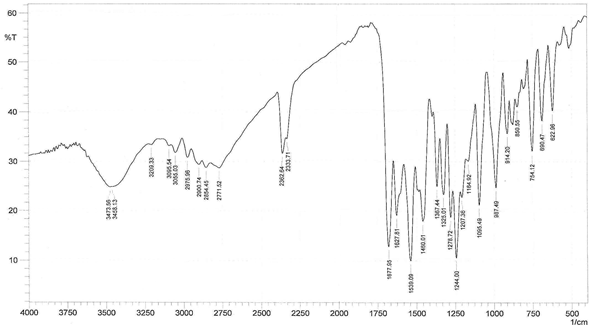
**


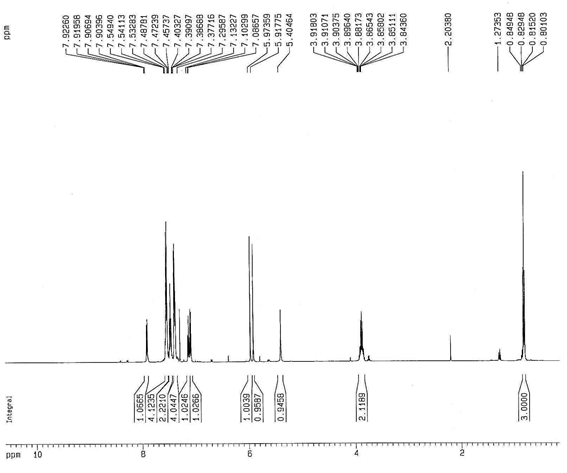


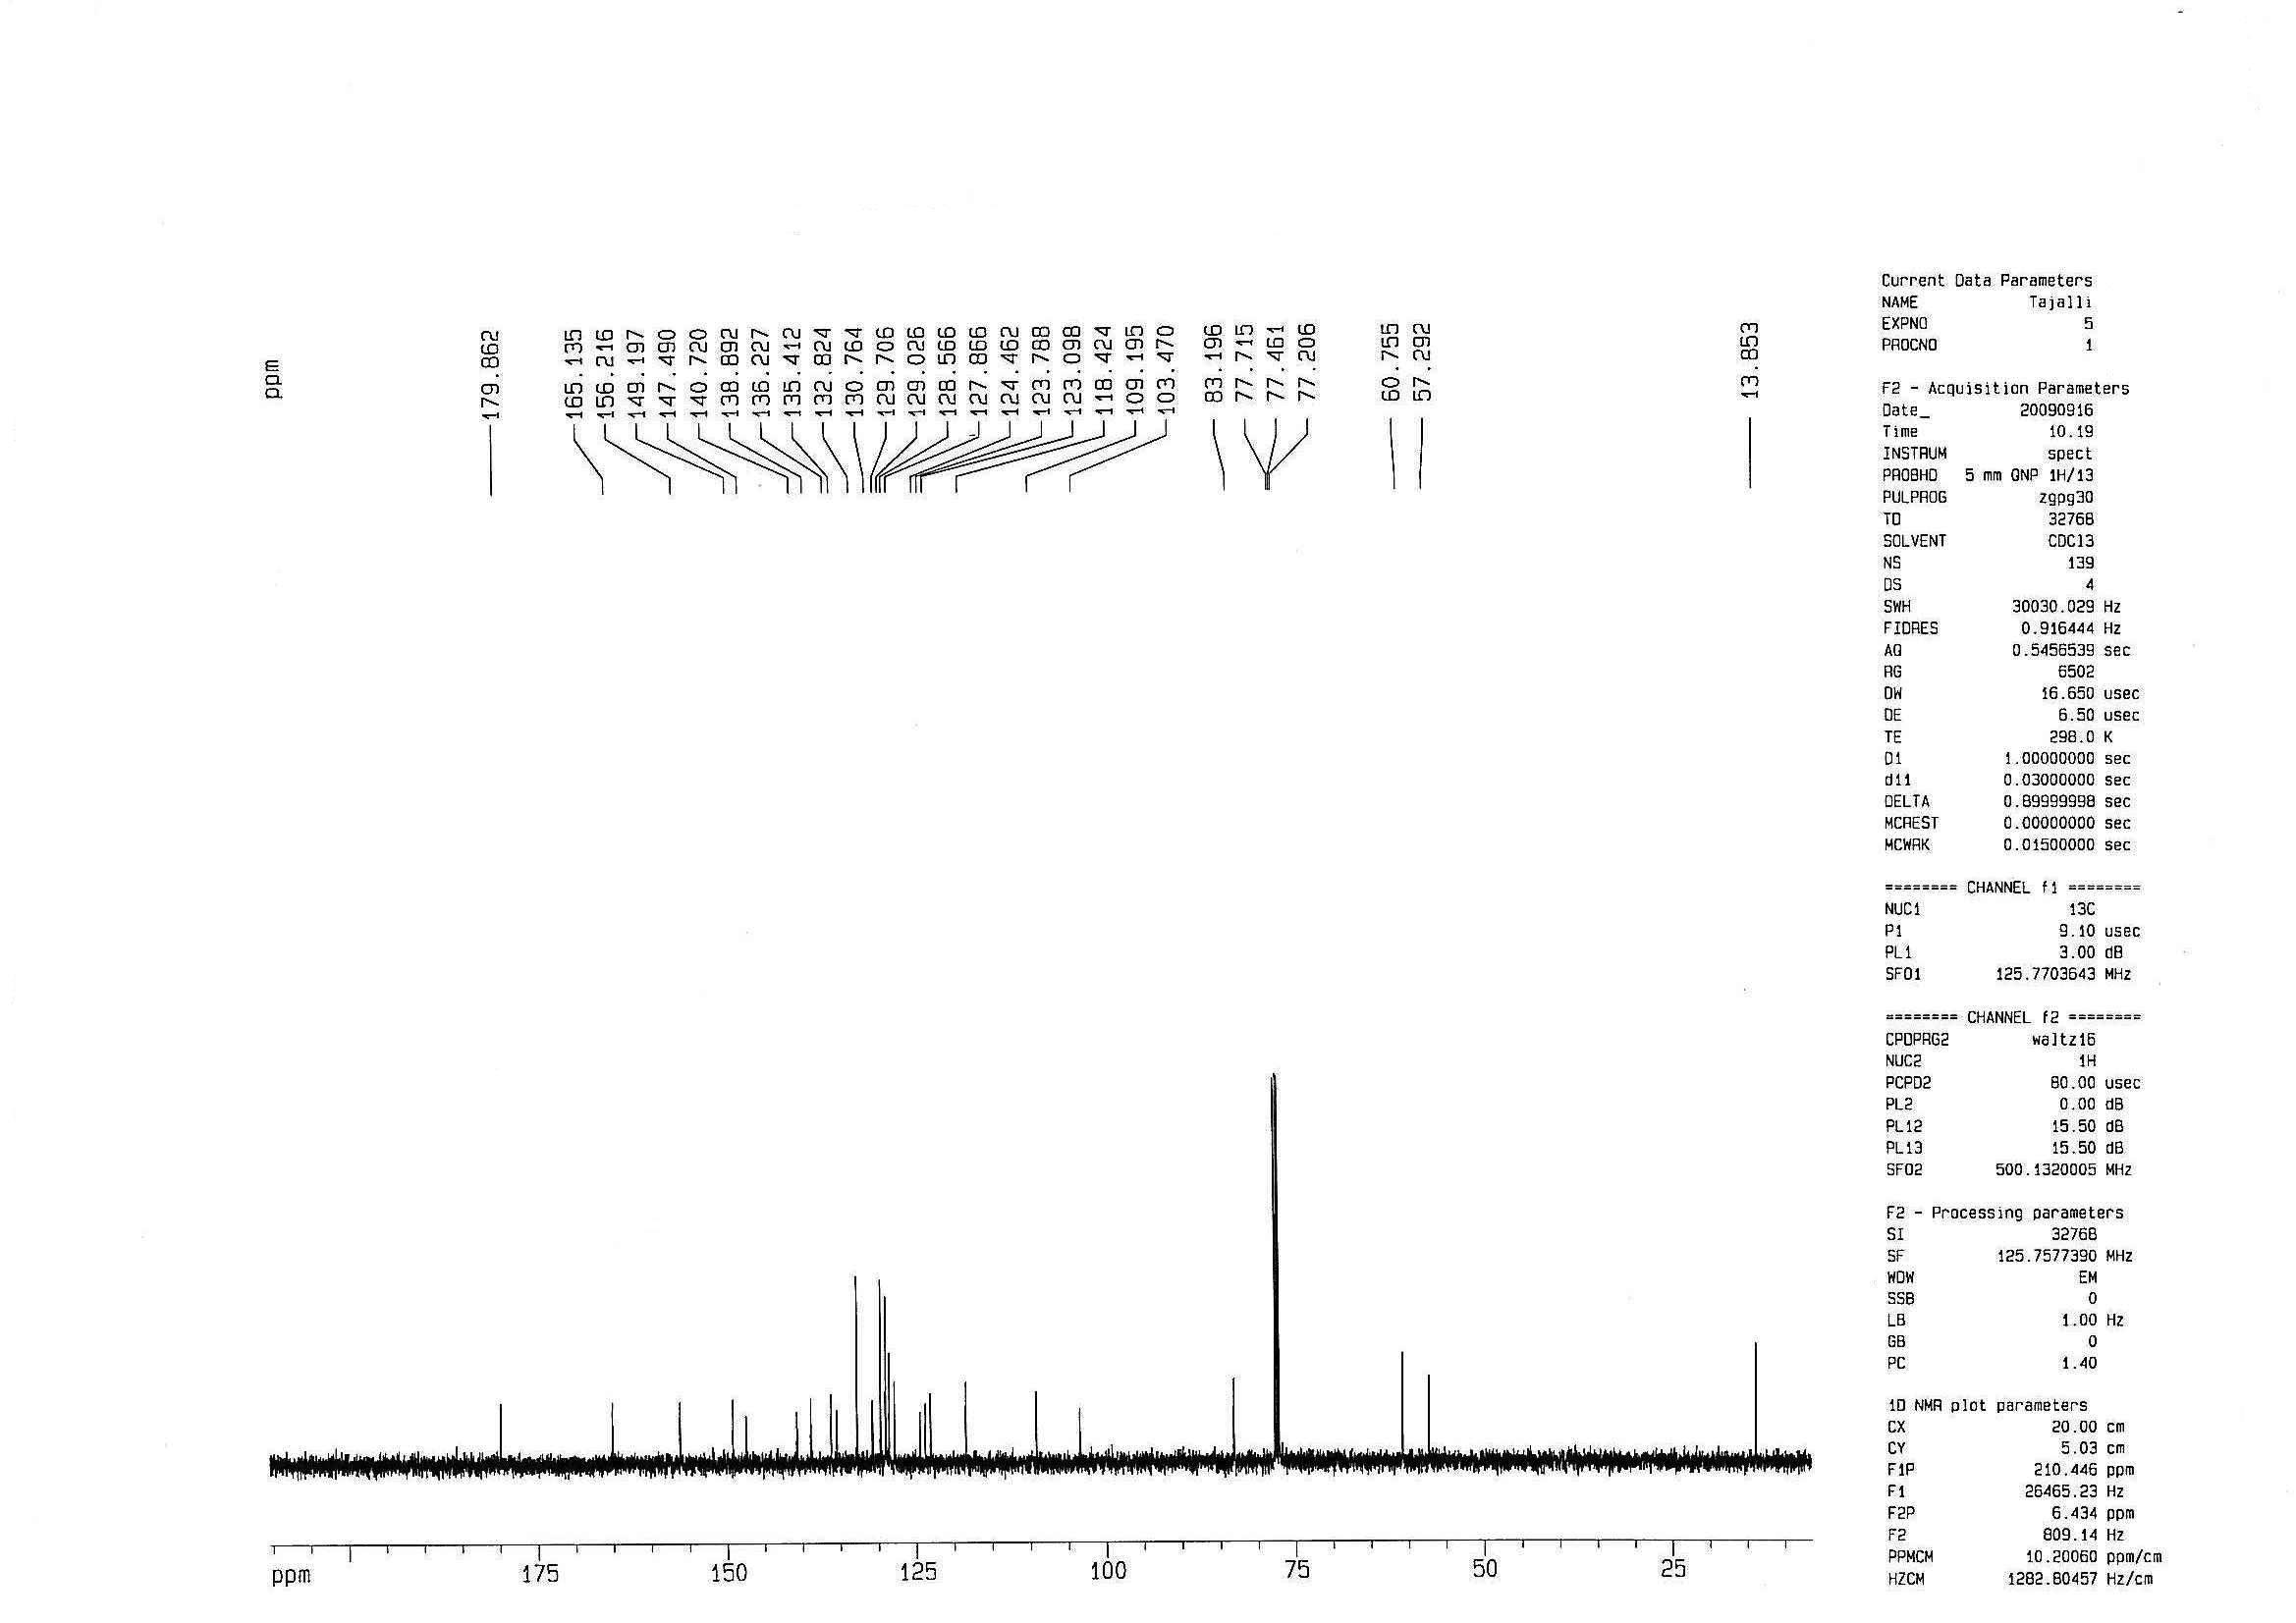


**Ethyl-2-(2-fluorophenyl)-4-phenyl-7-(2-hydroxybenzoyl)-4*H*-pyrimido[1,2-*a*pyrimidine -3-carboxylate (6g):**

Crystal yellow; m.p: 240-242 oC; IR (KBr, cm-1): 3431 (OH), 3093 (CH-Ar), 2966 (CH-Aliphatic), 1691 (CO); 1H NMR (500 MHz, CDCl3): δ = 0.60 (t, 3H, CH3), 3.62 (m, 2H, CH2), 5.74 (s, 1H, H-a), 5.80 (s, 1H, H-b), 6.03 (s, 1H, H-c), 6.87 (m, 3H, H-Ar), 6.97 (t, 1H, H-Ar), 7.13 (m, 1H, H-Ar), 7.20 (m, 5H, H-Ar), 7.31 (m, 2H, H-Ar), 7.62 (d, J= 7.87 Hz, H-Ar); 13C NMR (125 MHz, CDCl3) δ: 13.6, 57.6, 60.3, 82.9, 101.6, 108.5, 116.2, 116.3, 118.3, 122.7, 124.3, 125.3, 126.4, 127.4, 128.0, 128.5, 130.0, 131.2, 135.6, 136.0, 140.9, 148.3, 148.6, 156.1, 160.1, 164.5, 179.7 ppm. anal. calcd for C29H22FN3O4: C, 70.29; H, 4.48; F, 3.83; N, 8.48; O, 12.92. Found: C, 70.29; H, 4.49; F, 3.82; N, 8.48; O, 12.92.


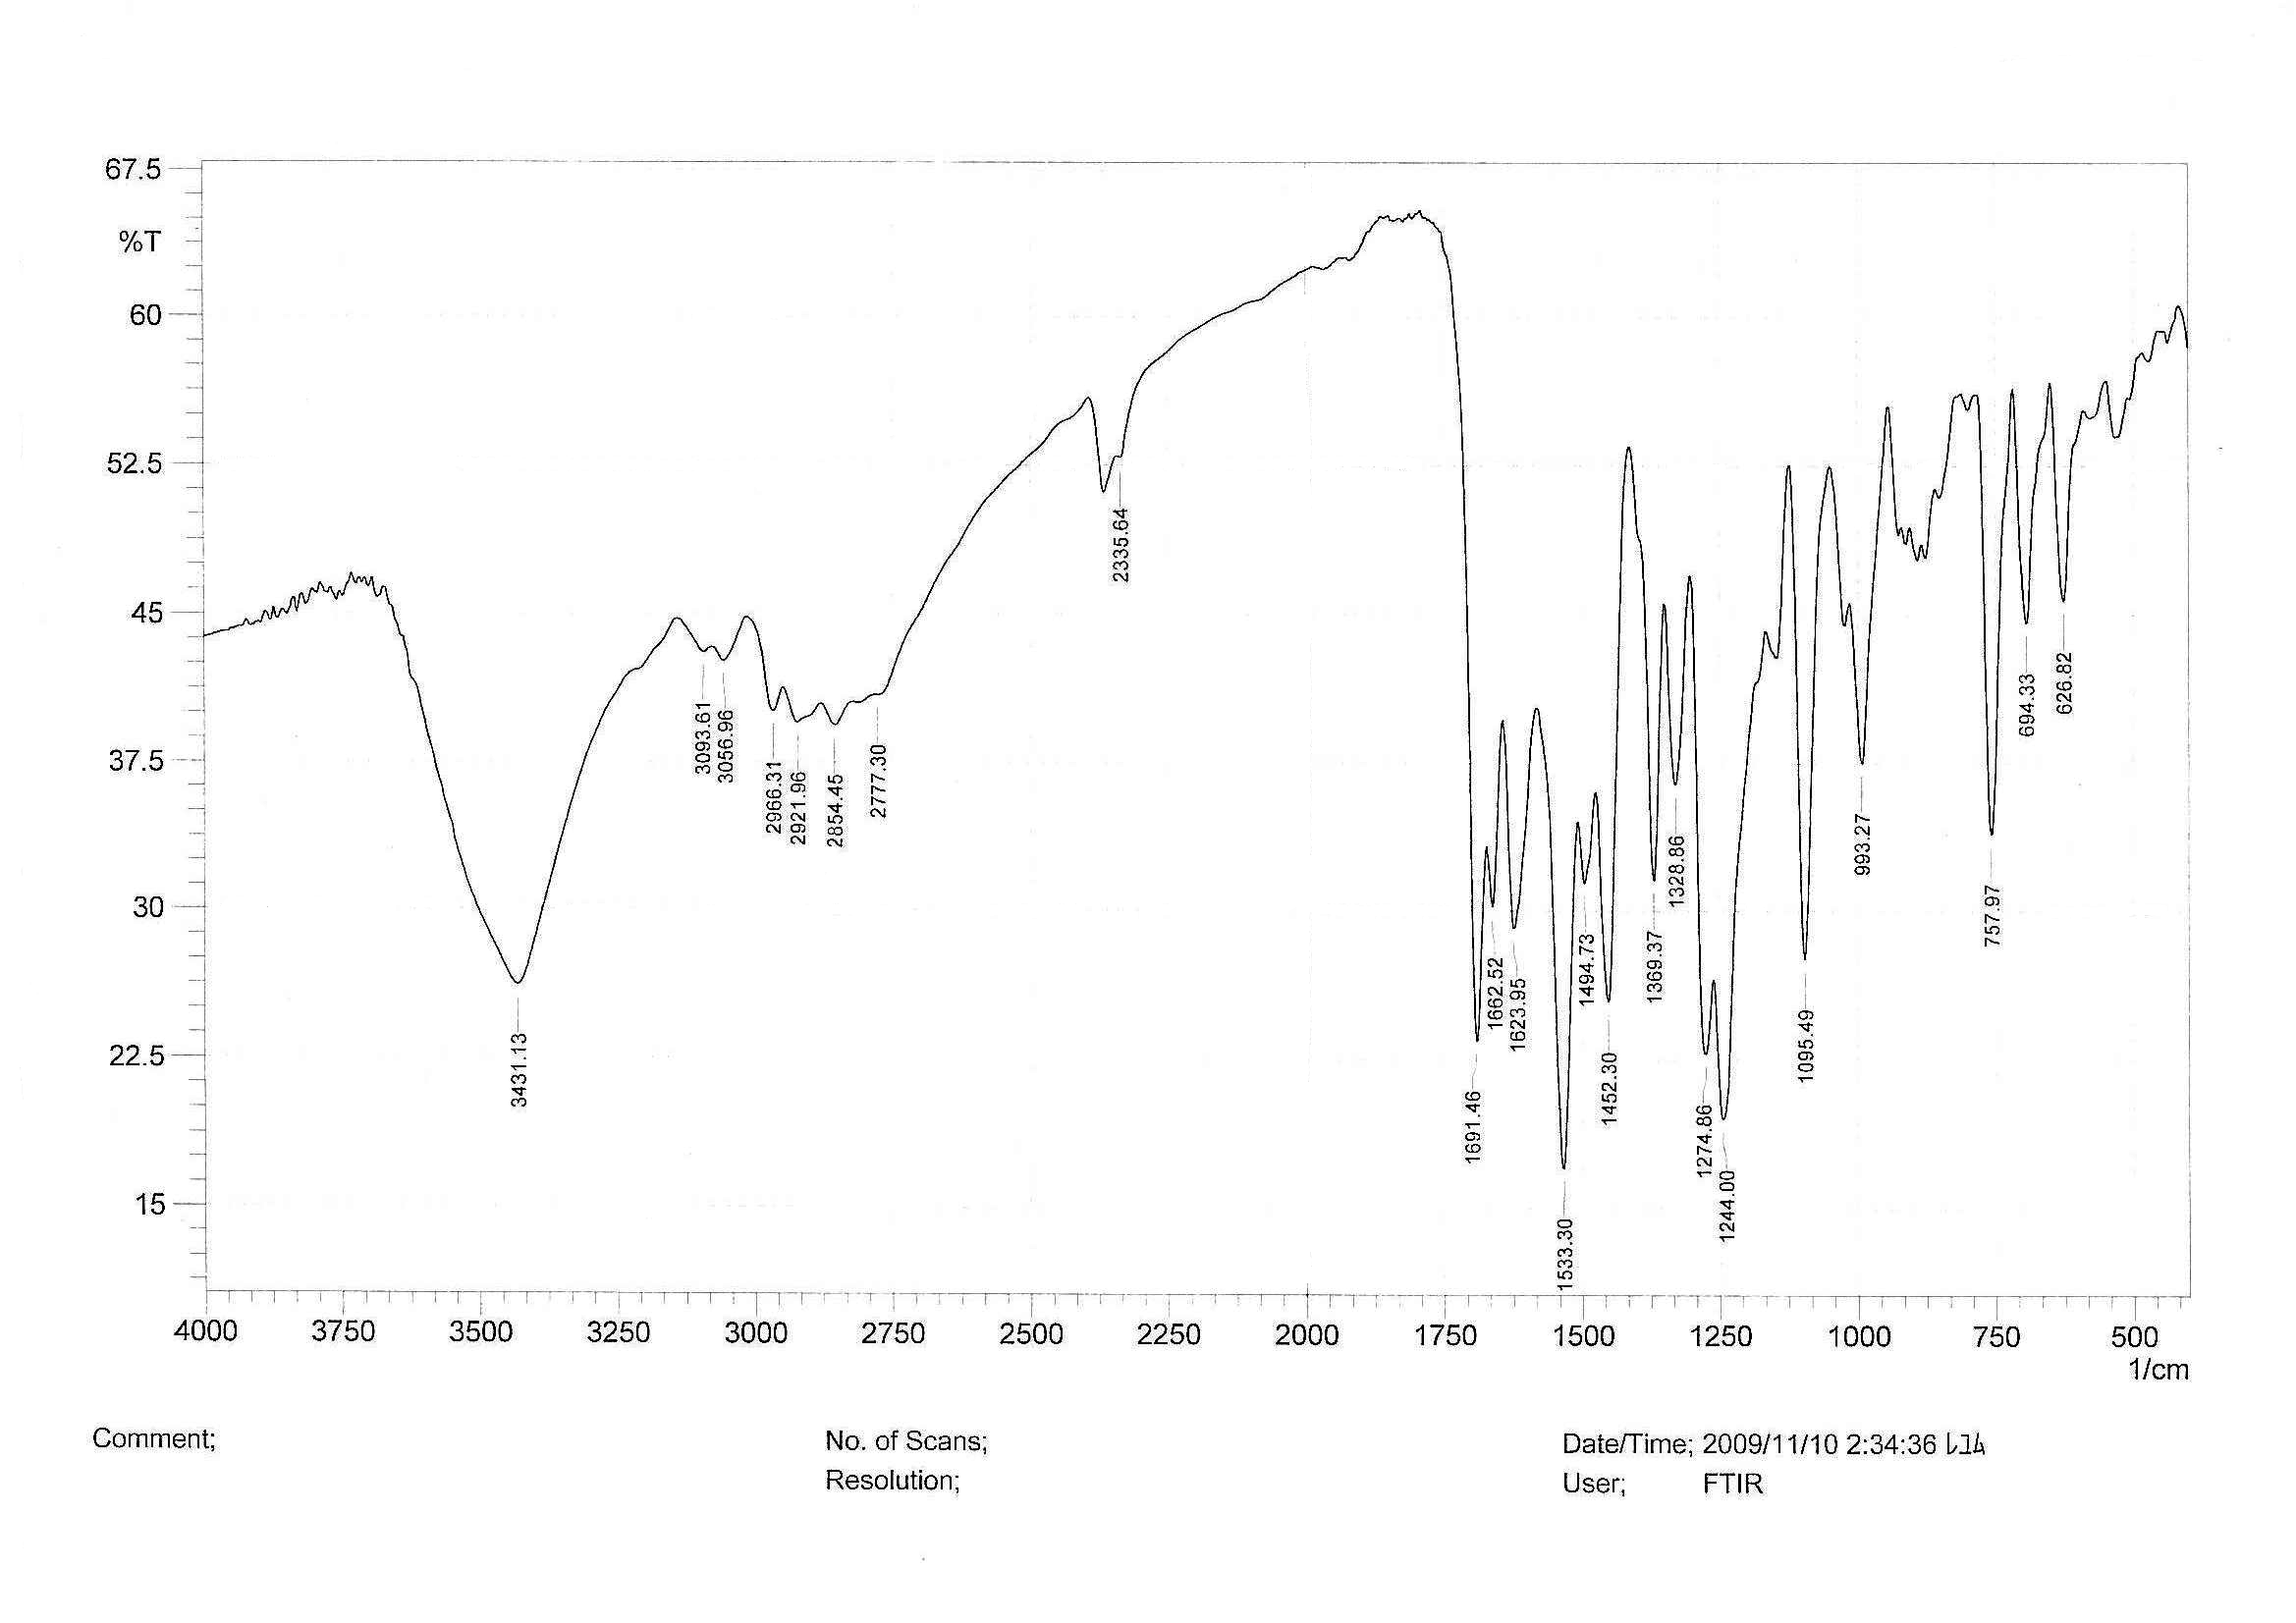


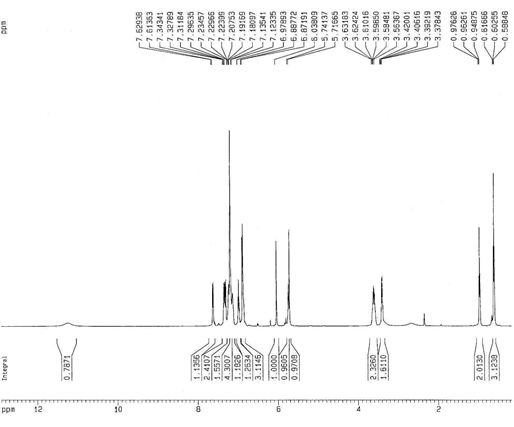


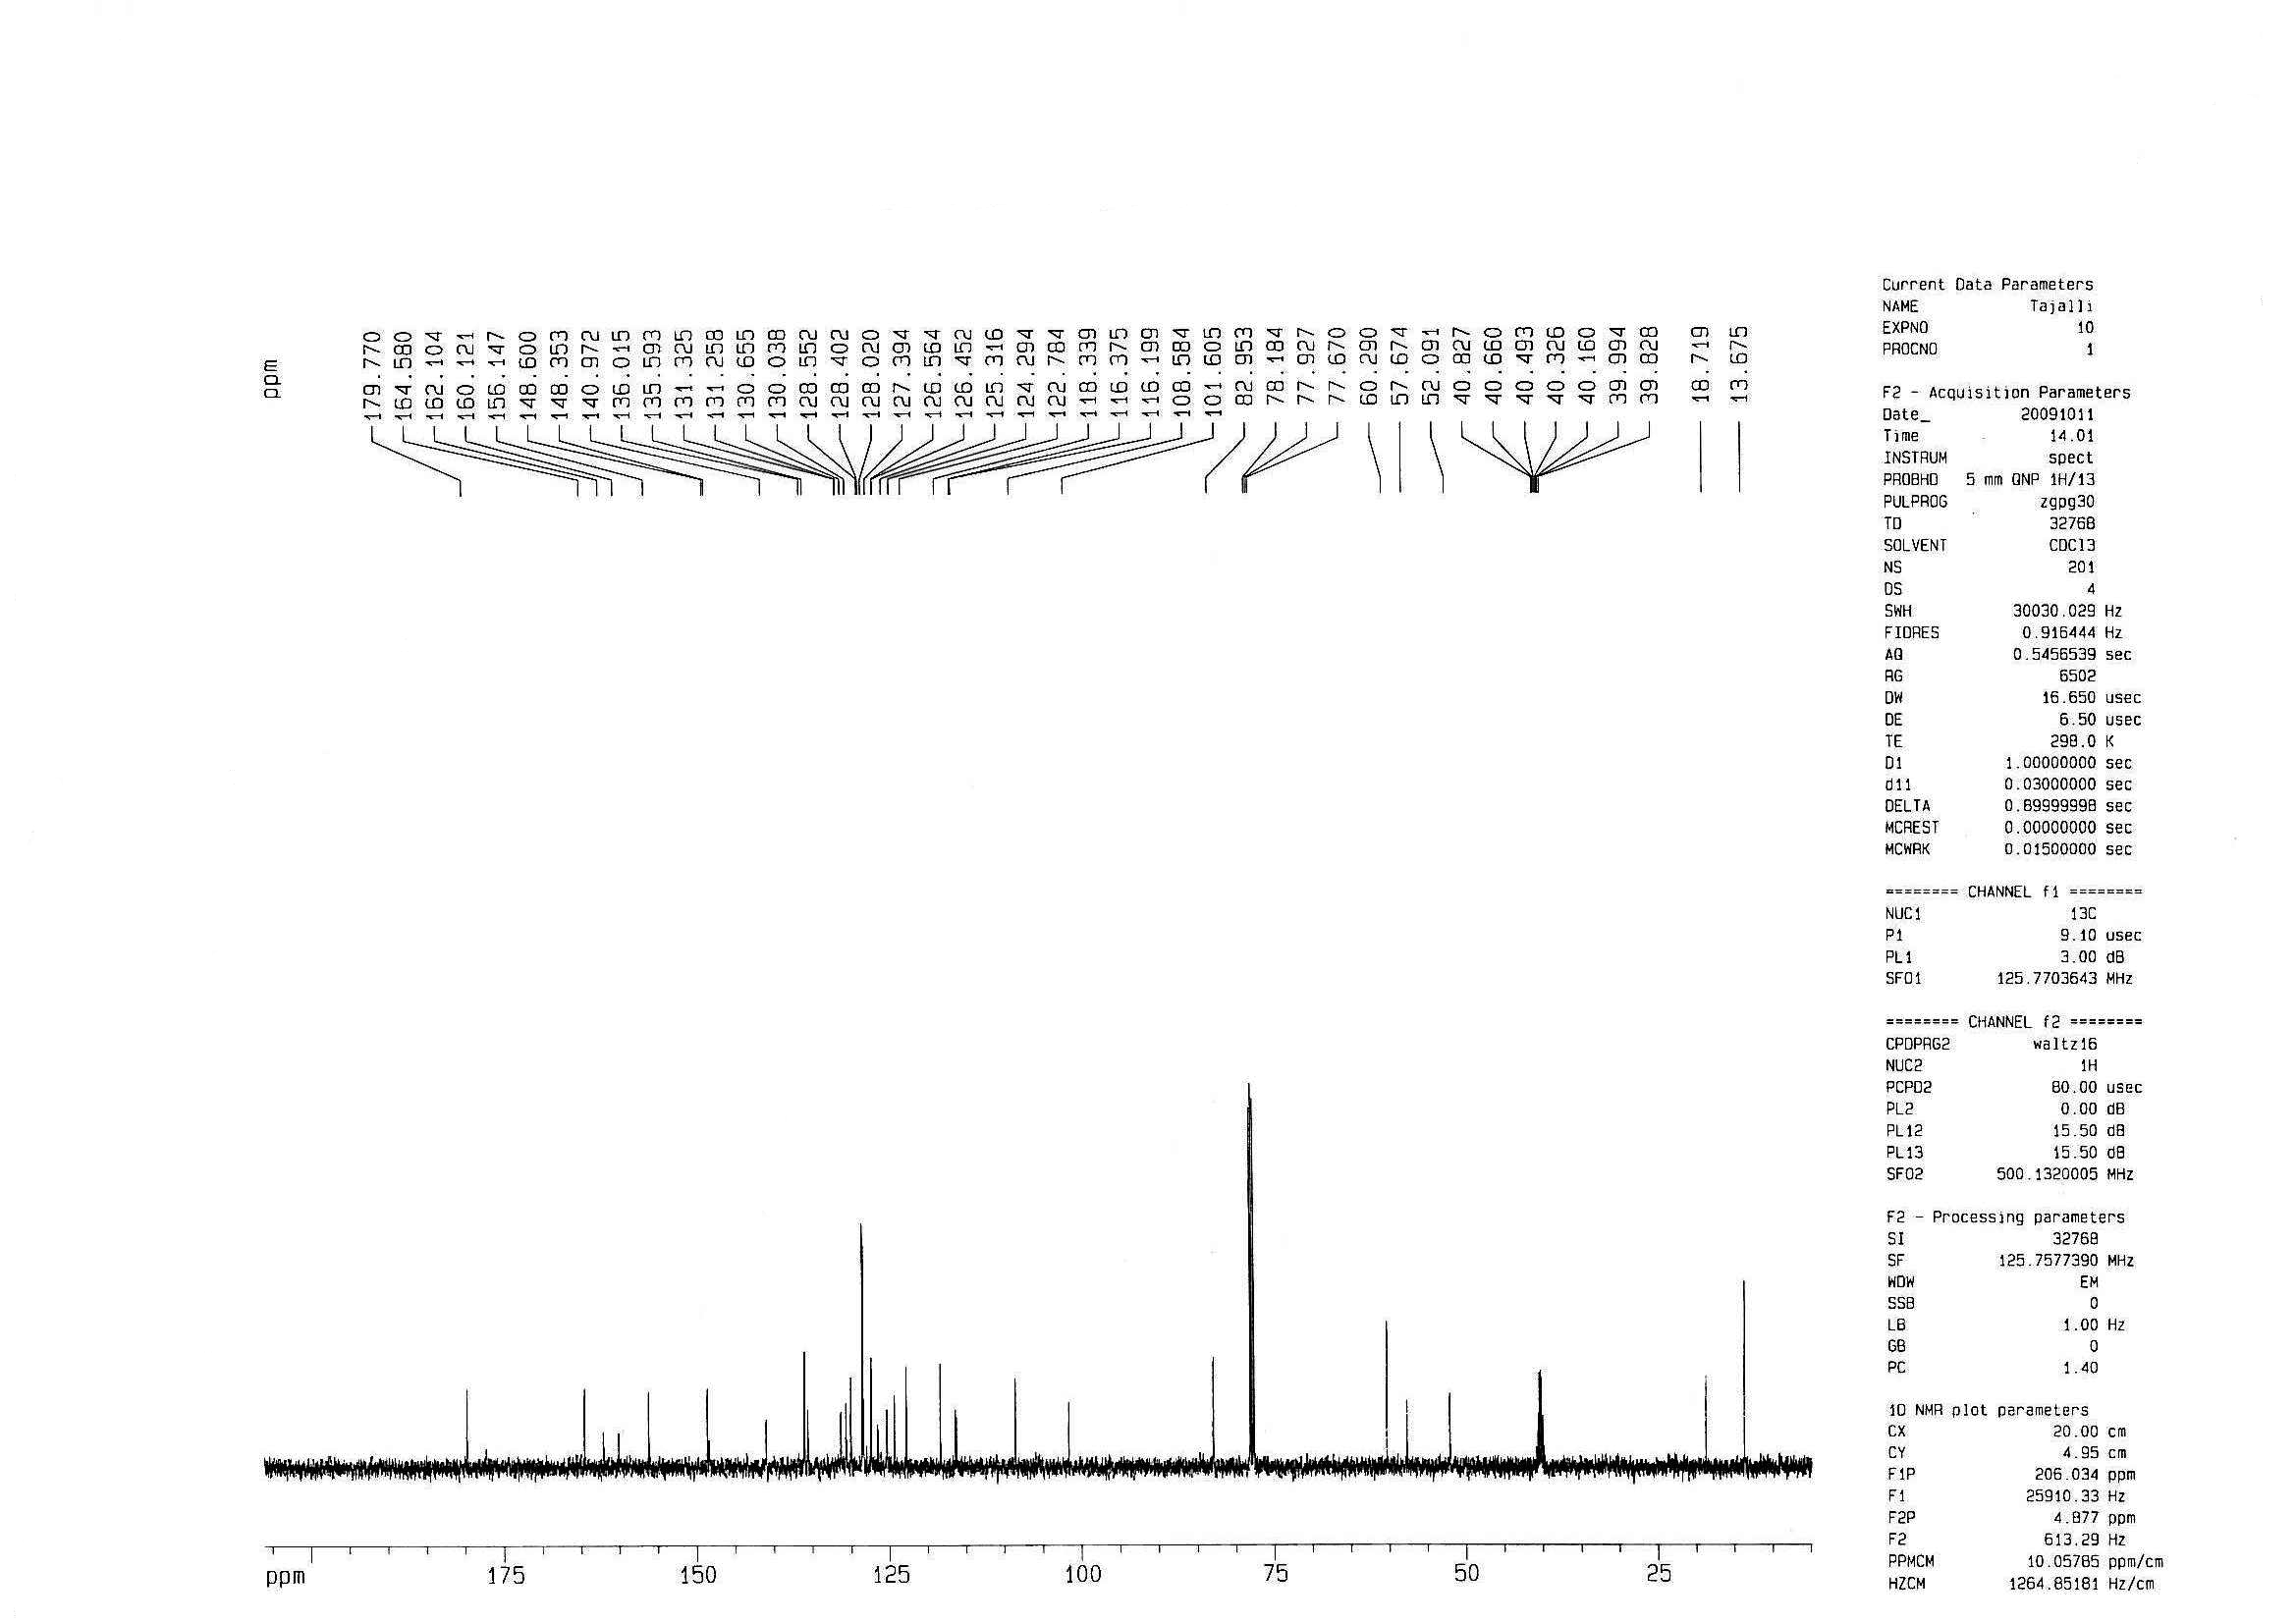


1. Corresponding author. Tel.: +98 1333480215, Fax: +98 1333480233, P. O. Box: 41335-3516, E-mail: [kefayati@iaurasht.ac.ir](mailto:kefayati@iaurasht.ac.ir), [haskefayati@gmail.com](mailto:haskefayati@gmail.com) (H. Kefayati) [↑](#footnote-ref-2)
